# 1 **Connectomic Analysis of the *Drosophila* Lateral Neuron Clock Cells**

## 2 **Reveals the Synaptic Basis of Functional Pacemaker Classes**

3  
4 Shafer, O.T.<sup>1,\*</sup>, Gutierrez G.J.<sup>2,\*</sup>, Li, K.<sup>3</sup>, Mildenhall, A.<sup>3</sup>, Spira, D.<sup>2,3</sup>, Marty, J.<sup>4</sup>, Lazar, A.A.<sup>4</sup>, and  
5 Fernandez M.P.<sup>3,#</sup>

6  
7  
8 1- Advanced Science Research Center, Graduate Center, The City University of New York. New York, NY 10031

9 2- Center for Theoretical Neuroscience, Zuckerman Institute, Columbia University. New York, NY 10027

10 3- Department of Neuroscience and Behavior, Barnard College. New York, NY 10027

11 4- Department of Electrical Engineering, Columbia University. New York, NY 10027

12  
13 \*Equal contribution

14 #Correspondence should be submitted to Maria Paz Fernandez (mfernand@barnard.edu)

15

16

### 17 **Abstract**

18 The circadian clock orchestrates daily changes in physiology and behavior to ensure internal  
19 temporal order and optimal timing across the day. In animals, a central brain clock coordinates  
20 circadian rhythms throughout the body and is characterized by a remarkable robustness that  
21 depends on synaptic connections between constituent neurons. The clock neuron network of  
22 *Drosophila*, which shares network motifs with clock networks in the mammalian brain yet is built  
23 of many fewer neurons, offers a powerful model for understanding the network properties of  
24 circadian timekeeping. Here we report an assessment of synaptic connectivity within a clock  
25 network, focusing on the critical lateral neuron (LN) clock neuron classes. Our results reveal that  
26 previously identified anatomical and functional subclasses of LNs represent distinct  
27 connectomic types. Moreover, we identify a small number of clock cell subtypes representing  
28 highly synaptically coupled nodes within the clock neuron network. This suggests that neurons  
29 lacking molecular timekeeping likely play integral roles within the circadian timekeeping network.  
30 To our knowledge, this represents the first comprehensive connectomic analysis of a circadian  
31 neuronal network.

## 32 **Introduction**

33

34 Most organisms undergo predictable daily changes in gene expression, physiology, and  
35 behavior that are driven by endogenous circadian clocks (1, 2). In animals, the molecular  
36 feedback loops underlying circadian clocks are present in all organ systems but are required  
37 within a relatively small population of brain neurons to maintain daily rhythms in behavior and  
38 physiology (3). In mammals, the hypothalamic suprachiasmatic nuclei (SCN) are the brain's  
39 central circadian clock since the ablation of the SCN or knockouts of the molecular clock within  
40 the SCN results in loss of circadian rhythms (reviewed by (4)). Compared to peripheral tissues,  
41 timekeeping in the brain's central clock is more resilient to the loss of clock gene function and to  
42 environmental perturbations. This resilience comes from physiological connections between  
43 SCN neurons (5, 6). Determining how clock neurons are connected is therefore essential to  
44 understand circadian timekeeping in animals.

45

46 A fundamental challenge to addressing this question is the complexity of the circadian neuronal  
47 networks. The paired mammalian SCN consist of tens of thousands of neurons with diverse  
48 neurochemical outputs that form a complex network (reviewed by (7)). The clock neuron  
49 network of *Drosophila melanogaster* offers a powerful model to understand the network  
50 properties of neural circadian timekeeping. The molecular clocks of insects and mammals are  
51 highly conserved and their neuronal networks appear to share common motifs (8). The fly's  
52 clock neuron network consists of relatively few neurons that can be organized in a small number  
53 of discrete anatomical classes ((9); Figure 1A). Furthermore, genetic tools to specifically  
54 manipulate subclasses of the fly circadian network have made it possible to understand the  
55 functional roles of these subclasses in the production of endogenous circadian rhythms in sleep  
56 and activity (10, 11). Though transgenic markers of synaptic connectivity and live-imaging-  
57 based assessments of functional connectivity have been used to address neural connectivity

58 within the clock neuron network (e.g., (12, 13), a systematic assessment of synaptic connectivity  
59 within this network is lacking.

60

61 The comprehensive mapping of synaptic connectivity using serial electron microscopy and  
62 reconstruction of neuronal volumes allows to assess network structures of brain circuits (14).  
63 Scheffer and colleagues (15) provided a dense reconstruction of chemical synapses within a  
64 large portion of the fly's central brain, called the hemibrain. Annotation of the hemibrain  
65 connectome contains most of the key anatomical subsets of the fly's clock neuron network and  
66 powerful computational tools are available to navigate this connectome (15, 16) making it  
67 possible to analyze the structure of the fly's brain clock network.

68

69 The *Drosophila* Circadian Neuron Network is a group of ~150 neurons that display synchronous  
70 oscillation in PER and TIM abundance and can be subdivided based on gene expression,  
71 anatomy, and location in the brain (17). These are (i) the lateral neurons (LNs), which can be  
72 subdivided into ventral lateral (LN<sub>v</sub>) and dorsal lateral (LN<sub>d</sub>) neurons, (ii) the lateral posterior  
73 neurons (LPNs), and (iii) the dorsal neurons (DNs), which can be subdivided into dorsal neurons  
74 1, 2, and 3 (DN1, DN2, and DN3) and further subdivided into anterior (DN1a) and posterior  
75 (DN1p) DN1s (9, 18, 19).

76

77 The LN<sub>v</sub>s release the key circadian neuropeptide Pigment Dispersing Factor (PDF) and can be  
78 further subdivided into small and large LN<sub>v</sub>s (s-LN<sub>v</sub>s and l-LN<sub>v</sub>s). Release of PDF from the s-  
79 LN<sub>v</sub>s, which takes place in the dorsal protocerebrum where the LN<sub>d</sub>s and DN<sub>s</sub> reside, is  
80 required for endogenous circadian timekeeping (20, 21). The current annotation of the  
81 hemibrain data set identifies all the expected lateral neuron classes: four l-LN<sub>v</sub>s, four s-LN<sub>v</sub>s,  
82 the 5th-s-LN<sub>v</sub>, and six LN<sub>d</sub>s ((15); Figure 1B and C). However, some clock neurons have not  
83 yet been unequivocally identified within the hemibrain data set: approximately half of the DN1ps

84 (13, 15) and the DN2s and DN3s. The LN classes of clock neuron represent the minimum sub-  
85 network required to produce endogenous bimodal rhythm of sleep and activity. A functional  
86 molecular clock only in the s-LNVs, 5th-s-LNV, and LNDs is sufficient to produce such rhythms  
87 (22, 23).

88

89 Here we report an assessment of chemical synaptic connectivity for the critical LN clock neuron  
90 classes within the hemibrain volume. We have determined the patterns of synaptic connectivity  
91 within this core LN circadian sub-network and the connectivity with other clock neurons  
92 annotated within the hemibrain dataset. This analysis provides significant and comprehensive  
93 insight into the synaptic circuitry underlying the organization and function of the *Drosophila*  
94 central brain clock. Our results reveal that previously identified anatomical and functional  
95 subclasses of LNs are distinct connectomic classes which receive unique sources of synaptic  
96 inputs and outputs. Furthermore, our analysis reveals a remarkable heterogeneity in how clock  
97 neuron subclasses form connections to other clock neurons and identifies a small number of  
98 clock cell subtypes that are highly synaptically coupled nodes. Finally, we find “non-clock  
99 neuron” targets which themselves form synapses back onto clock neurons. We propose that  
100 those non-clock cells are important components of the timekeeping network.

101

## 102 **Results**

103

### 104 **The Clock Neuron Network and the Hemibrain Dataset**

105

106 Representatives of all classes of clock neurons, with the exception of the DN2 and DN3 classes,  
107 have been identified in the hemibrain volume used here (Figure 1A and B). See Table 1 for the  
108 naming scheme used here for the clock neurons identified in the dataset with their

109 corresponding unique body IDs. The patterns of connectivity among some of these neurons  
110 have recently been briefly described (11, 13). Scheffer and colleagues (15) define synaptic  
111 strength within the hemibrain volume by the number of synaptic connections formed between  
112 neurons, defining connections consisting of only one or two chemical synapses as weak and  
113 subject to error, three to nine synapses as medium strength, and of ten or more synapses as  
114 strong. We used these definitions of synaptic strength in this study. As a whole, the identified  
115 clock neurons appear to be sparsely interconnected by chemical synapses. Most clock neuron  
116 pairs form either no synapses or weak synaptic connections (Figure 1C). However, there are a  
117 few clear exceptions: a single LN<sub>d</sub> (LN<sub>d</sub>6) and the 5<sup>th</sup> s-LN<sub>v</sub> form strong connections with one  
118 another and with members of the DN1 group (Figure 1C; see also Reinhard and colleagues  
119 (13)) and stand out among the clock neurons as hubs of inter-clock synaptic connectivity.

120

121 To assess synaptic connectivity in the *Drosophila* clock network, we focused on three critical  
122 classes of lateral clock neurons (LNs); the 4 Pigment Dispersing Factor (PDF) -expressing small  
123 ventral lateral neurons (s-LN<sub>v</sub>s), the 6 dorsal lateral neurons (LN<sub>d</sub>s) and the PDF negative 5<sup>th</sup>  
124 s-LN<sub>v</sub> (Figure 1D). We have chosen to focus on these clock neuron classes for two reasons.  
125 First, these classes are completely accounted for in the hemibrain annotation used here.  
126 Second, the 11 neurons that comprise the LN class are sufficient to drive the fly's endogenous  
127 bimodal rhythm in locomotor activity (22, 23) and therefore represent a critical sub-network  
128 within the fly's circadian system.

129

130 **The small LN<sub>v</sub>s are a highly unified connectomic class distinct from the 5<sup>th</sup> s-LN<sub>v</sub>.**

131

132 The s-LN<sub>v</sub>s have long been considered critical circadian pacemakers within the *Drosophila*  
133 clock neuron network (24). These cells express the neuropeptide PDF (20, 25), maintain strong  
134 molecular timekeeping under constant conditions (26, 27) and are required for robust

135 endogenous circadian rhythms (22, 28). The s-LNvs also contribute to the morning peak of the  
136 fly's crepuscular daily activity rhythm (22, 29). Though by no means the only clock neurons  
137 capable of producing an endogenous sense of time (30-32), a large body of evidence supports  
138 the notion that s-LNvs are among the most critical neurons for the maintenance of endogenous  
139 circadian rhythms (Reviewed by (11)). The 5<sup>th</sup>-s-LNv was named because it was initially thought  
140 to be anatomically similar to the PDF positive s-LNvs in the larval brain (23, 33). However,  
141 subsequent work has suggested that the 5<sup>th</sup> s-LNv is likely functionally and anatomically more  
142 akin to the LNds (22, 30, 34).

143

144 The four PDF-expressing s-LNvs are characterized by a relatively simple morphology (Figure  
145 2A-C; (19)). Their cell bodies are located in the ventral brain, near the accessory medulla  
146 (AMe), into which they extend short neurites which likely receive input from photoreceptors (35,  
147 36). These four s-LNvs project dorsally to the posterior dorsal protocerebrum, where they turn  
148 toward the midline and form fine ramified termini that extend toward the midline (19, 37). These  
149 dorsal ramifications are thought to be the major site of s-LNv synaptic output, but are also  
150 known to contain synaptic inputs (38). Work by Schubert and colleagues (34) showed that the  
151 5<sup>th</sup> s-LNv (Fig 2F) has more extensive ramifications within the dorsal brain and accessory  
152 medulla than the PDF expressing s-LNvs.

153

154 The four PDF-expressing s-LNvs and the 5<sup>th</sup> s-LNv have been identified within the hemibrain  
155 data set (Figures 1B-C and Figure 2A,F; (15)). Visualization of T-bars and postsynaptic  
156 densities within these neurons reveals that their ventral neurites, which innervate the AMe, are  
157 biased toward receiving synaptic input (Figure 2A and F). Individual PDF-positive s-LNvs  
158 display relatively simple dorsal medial termini with relatively few branch-points that tend to run in  
159 parallel to neighboring branches (Supplemental Figure 1). As previously described (38), these  
160 dorsal medial s-LNv termini contain both presynaptic and postsynaptic structures with the

161 former significantly outnumbering the latter (Figure 2A and Supplemental Figure 1). The dorsal  
162 termini of the 5<sup>th</sup> s-LNvs also contains both pre- and post-synaptic structures but appear to be  
163 less biased toward output compared to the PDF expressing s-LNvs (Fig. 2F). Taken together,  
164 the four *pdf+* s-LNvs form a total of 2238 synapses within the hemibrain volume: 505 inputs  
165 (postsynaptic densities) and 1733 outputs (projections onto postsynaptic densities). The single  
166 5<sup>th</sup> s-LNv contains 1413 post-synaptic densities and forms synapses onto 1992 postsynaptic  
167 densities. Thus, the 5<sup>th</sup> s-LNv forms about four times the number of synapses of a single PDF-  
168 positive s-LNv (Figure 4C; Supplemental Table S1 and S2).

169  
170 The four *pdf+* s-LNvs display uniformity in their synaptic inputs for strong synaptic connections.  
171 Only three neurons in the hemibrain provide ten or more synapses onto at least one of these  
172 cells (Figure 2D), and all four receive strong or medium strength synaptic inputs from these  
173 three presynaptic cell types (Figure 4D; Supplemental Table S1). They also appear to be  
174 remarkably uniform in their patterns of strong synaptic output. Only 11 neurons receive 10 or  
175 more synapses from at least one *pdf+* s-LNv (Figure 2E and 4E), and all 11 receive strong or  
176 medium strength synapses from all four (Figure 4E; Supplemental Table S2). Compared to the  
177 other LN classes, these s-LNvs are highly similar to each other in both their strong and medium  
178 strength connections (Figure 4A and B) and form few but nearly uniform patterns of strong  
179 shared synaptic connections (Figure 4D and E). Notably, within the hemibrain volume, the *pdf+*  
180 s-LNvs are not strongly connected to other clock neurons, though they do form medium strength  
181 connections with one another (Figures 1C and 2H). The 5<sup>th</sup> s-LNv displays patterns of strong  
182 synaptic connectivity that are almost completely distinct from those of the four *pdf+* s-LNvs,  
183 sharing a single strong output connection with only one of these cells (Figure 2E).

184  
185 Though quite uniform in their patterns of strong synaptic input and outputs, the *pdf+* s-LNvs do  
186 display some within-class differences in their patterns of weak and medium strength

187 connections. Among the inputs targeting only one s-LNv, and mediated by only three synapses,  
188 is the HB-eyelet, a surprising finding given the long-held model that this external photoreceptor  
189 provides direct excitatory input onto s-LN<sub>v</sub>s and contributes to light entrainment of circadian  
190 rhythms (35, 36, 39), though recent work has indicated that the eyelet to s-LNv connection may  
191 be polysynaptic (40). Nevertheless, our analysis supports the notion that the *pdf+* s-LN<sub>v</sub>s  
192 represent a uniform connectomic cell type with regard to patterns of strong synaptic  
193 connections, consistent with recent work revealing a uniformity in gene expression across the s-  
194 LNvs (41).

195

### 196 **The LNds comprise several connectomic subclasses.**

197

198 As their name suggests, the somata of the dorsal lateral neurons (LNds) are situated dorsally  
199 relative to the LNvs, residing in the lateral cell body rind (19, 33, 34). All six LNds send dorsal  
200 medial projections across the superior protocerebrum and three send an additional projection  
201 toward the ventral brain ((34); Figure 3A-C and Supplemental Figure S2). Though consisting of  
202 only two more neurons than the PDF-positive s-LNv class, the LNds form seven-times more  
203 synaptic connections (6149 postsynaptic densities and projections to 9590 PSDs; compare  
204 Figures 2A, 3A, and 4C) and are characterized by a much larger number of strong synaptic  
205 partners. There are 164 distinct neurons that receive strong synaptic inputs from at least one  
206 LNd (compared to 11 neurons for *pdf+* s-LNvs; (Supplemental Table S2), and 86 distinct  
207 neurons provide strong synaptic input onto at least one LNd (compared to three for s-LNvs;  
208 Supplemental Table S2).

209

210 In addition to forming more synapses with more neurons than the PDF-positive s-LNvs, the  
211 LNds are markedly less uniform in their patterns of strong synaptic connections (Figures 3E and  
212 F and 4F and G). There is not a single source of strong synaptic input or a single neural target



213 of synaptic output that forms strong connections with all six LNds (Figure 3E and F,  
214 Supplemental Tables S1 and S2). The maximum number of LNds that receive strong synaptic  
215 inputs from the same presynaptic neuron is three (Figure 3F). The maximum number of LNds  
216 that form strong synaptic outputs onto the same neuronal targets is also three (Figure 3F).  
217 Based on these patterns of shared strong connectivity, there appear to be two connectomic  
218 groups within the LNds, each consisting of three neurons: LNds 1-3 and LNds 4-6. LNds within  
219 these two subgroups are more similar in their patterns of strong synaptic connectivity to each  
220 other than to LNds of the other group (Figure 3E and F and 4F and G). These two groups differ  
221 to a notable degree in the number of their synaptic connections, with the LNd 4-6 group forming  
222 approximately twice the number of synaptic connections (Figure 4C; Supplemental Figure S2  
223 and Supplemental Tables S1 and S2).

224

225 Examining the cellular morphology of the LNds within the hemibrain volume reveals that LNds  
226 4-6 extend both dorsal-medial and ventral projections, whereas LNds 1-3 extend only dorsal-  
227 medial projections (Supplemental Figure S2). As shown by Schubert and colleagues (34), this  
228 indicates that LNds 4-6 are the Cryptochrome (Cry) expressing LNds, while LNds 1-3  
229 correspond to the Cry-negative LNds (Figure 3D). Though the Cry+ and Cry- subgroups of the  
230 LNds appear to be two distinct connectomic subtypes, patterns of strong synaptic connectivity  
231 suggest that the LNds can be further divided based on their patterns of strong synaptic  
232 connections. Within the Cry+ LNds, LNd4 and LNd5 share 27 strong synaptic inputs with one  
233 another, but only seven strong connections with LNd6 (Figure 3E). Similarly, LNd4 and LNd5  
234 share 33 strong synaptic targets with one another but only seven or fewer with LNd6 (Figure  
235 3F). Thus, the Cry+ LNds appear to consist of at least two connectomic subgroups, LNd4/LNd5  
236 and LNd6. This connectomic distinction is consistent with differences in neuropeptide  
237 expression within the Cry+ LNds, with two LNds expressing short neuropeptide F (sNPF) and  
238 the third expressing ion transport peptide (ITP), a feature it shares with the Cry expressing 5th

239 s-LNV (42). A similar distinction can be made for the Cry-negative LNds, LN<sub>d2</sub>/LN<sub>d3</sub> and LN<sub>d1</sub>,  
240 in terms of patterns of strong synaptic connections (Figure 3E and F). Based on these patterns  
241 of strong synaptic connections, the LN<sub>d</sub> class appears to consist of four distinct connectomic  
242 types. This number matches the number of transcriptomic classes of LNds recently revealed by  
243 single cell sequencing (41).

244

245 **The four connectomic groups of LN<sub>d</sub> clock neurons correspond to previously identified**  
246 **cellular and functional clock subsets.**

247

248 In addition to differences in *cry* expression, the LNds display other cellular and functional  
249 distinctions, suggesting that this clock neuron class consists of multiple neuronal subtypes. The  
250 LNds are divisible based on their expression of neuropeptides and neurotransmitters (42), with  
251 two LNds co-expressing sNPF and Choline acetyltransferase (ChAT), an enzyme involved in  
252 the biosynthesis of acetylcholine. Three LNds express Neuropeptide F (NPF), one of which  
253 expresses a second peptide, ITP (42). The transmitter(s) produced by the remaining LN<sub>d</sub> are  
254 not currently known. Furthermore, Cry<sup>+</sup> and Cry<sup>-</sup> LNds differ in their expression of Pdf receptor  
255 (PdfR), with the Cry<sup>+</sup> LNds uniformly expressing PdfR and the Cry<sup>-</sup> LNds lacking receptor  
256 expression (43), suggesting that these two groups of LN<sub>d</sub> are differentially sensitive to PDF  
257 released from the l-LN<sub>v</sub>s and s-LN<sub>v</sub>s.

258

259 The coupling of LNds to circadian timekeeping within the s-LN<sub>v</sub>s varies among the LNds. The  
260 two sNPF positive LNds, which express Cry and PdfR, remain tightly coupled to the s-LN<sub>v</sub>s  
261 when the circadian clock in the latter neurons is slowed down (30). The sNPF expressing LNds  
262 were termed E1 oscillators based on this tight temporal coupling to the s-LN<sub>v</sub>s (30), which also  
263 express sNPF (42). The NPF/ITP expressing LN<sub>d</sub>, despite being receptive to PDF released  
264 from the LN<sub>v</sub>s, does not display coupling to the slowed s-LN<sub>v</sub> clocks and was grouped with the

265 ITP-expressing 5<sup>th</sup> s-LNv as E2 oscillators (30). The remaining LNds, which consist of the Cry  
266 negative LNds, were classified as E3 oscillators, which are neither PDF receptive nor coupled to  
267 s-LNvs with modified clock speeds (30).

268

269 The Cry+ LNds therefore appear to consist of two functional types; two LNds making up E1 and  
270 a single LNd corresponding to E2. Schubert and colleagues (34) established the anatomical  
271 hallmarks of these two Cry+ LNds, with the single E2 LNd sending more extensive ventral  
272 projections compared to the E1 LNds. Examination of hemibrain LNd volumes indicates that  
273 LNd6 corresponds to LNd-E2 (compare Supplemental Figure S2D and E to F), and that LNd4  
274 and LNd5 are the E1 LNds. This LNd5/4 (E1) and LNd6 (E2) distinction mirrors the patterns of  
275 shared strong synaptic connectivity displayed by the Cry+ LNds (Figure 3E and F). Therefore,  
276 functionally distinct LNd subgroups share patterns of strong synaptic inputs and outputs.

277

278 The 5<sup>th</sup> s-LNv, which shares cellular and anatomical similarities with LNd6 (34, 42), was  
279 assigned as a member of the E2 functional class by Yao and Shafer (30), based on the absence  
280 of coupling to timekeeping within the PDF positive s-LNvs, despite receptivity to PDF and their  
281 role in the generation of evening activity (22). We therefore asked if LNd6 and the 5<sup>th</sup> s-LNv  
282 display similar patterns of synaptic connectivity. Indeed, these two neurons displayed  
283 significant overlap in their strong synaptic connectivity, both for synaptic inputs and targets  
284 (Figure 4F and G). Thus, LNd6 and the 5<sup>th</sup> s-LNv are more alike in their patterns of strong  
285 synaptic connectivity than they are to other lateral neuron subtypes in addition to sharing  
286 neuropeptide expression and coupling mode with the PDF expressing s-LNvs.

287

288 The patterns of strong clock neuron connectivity within the hemibrain led us to hypothesize that  
289 the recognized functional subtypes, M (PDF positive s-LNvs), E1 (LNd4 and LNd5), E2 (LNd6  
290 and 5<sup>th</sup> s-LNv), and E3 (LNd1, LNd2, and LNd3) display distinct patterns of synaptic

291 connectivity. To test this hypothesis, we expanded our analysis to include both strong and  
292 medium strength synaptic connections, which together account for the vast majority of  
293 connections made by the identified clock neurons within the hemibrain dataset. To examine  
294 affinities between individual identified clock neurons in our expanded consideration of  
295 connectivity, we used the Jaccard index (Fig 4A and B), a coefficient of similarity between two  
296 sets that ranges between zero and one, the former value indicating no overlapping synaptic  
297 partners and latter indicating complete overlap (see methods). Jaccard indices for both synaptic  
298 inputs (Fig 4A) and outputs (Fig 4B) provide strong evidence that the LN classes can be divided  
299 into four connectomic groups: The four PDF positive s-LNVs (M group; Figure 6), two of the  
300 Cry+ LNds (LNd4 and LNd5; E1 group; Figure 7), LNd6 and the 5<sup>th</sup> s-LNv (E2 group; Figure 8  
301 and Supplemental Figure S3), and the Cry- LNds (LNd1, LNd2, and LNd3; E3 Group; Figure 9),  
302 conforming to the functional divisions hypothesized by Yao and Shafer (30).

303

304 These functional LN divisions also have different numbers of synaptic connections and different  
305 ratios of input to output synapses. The M group displays the smallest number of synapses, E3  
306 an intermediate number, and E1 and E2 form roughly twice the number of connections  
307 displayed by E3 (Figure 4C). The M and E1 groups also appear distinct from the E2 and E3  
308 groups in the balance of output to input synapses. Though all the identified LNs form more  
309 synaptic outputs than inputs, output synapses in the M and E1 groups make up a larger  
310 proportion of total synaptic connections when compared to the E2 and E3 groups (Figure 4).

311 Thus, the connectomic subgroups that emerged from our analysis of strong synaptic  
312 connectivity (Figures 2-4) are further supported by the combined analysis of strong and medium  
313 strength connectivity (Supplemental Figures 4 and 5) and conform to previously hypothesized  
314 functional and cellular subgroups.

315

316 **The Functional/Connectomic Subgroups of LN Clock Cells Display Distinct Synaptic**  
317 **Output Pathways**

318

319 In animals, the brain's endogenous central circadian clock drives myriad behavioral,  
320 physiological, and endocrine rhythms. Synaptic connections between the central clock network  
321 and neurons outside the timekeeping network are thought to mediate daily signals from the  
322 circadian system to the neural centers responsible for driving daily physiological and behavioral  
323 changes. Though specific output pathways linking the clock to specific endocrine and sleep  
324 control centers have been previously described in the fly (Reviewed by (10, 44)), there is still a  
325 great deal to be learned about circadian output signaling. For example, do the various functional  
326 groups of clock neurons converge on the same synaptic targets to shape the timing of the same  
327 daily outputs, as was recently described for arousal promoting pathways linking the LNs to  
328 dopaminergic neurons modulating the ellipsoid body (45)? Alternatively, do functional clock cell  
329 subgroups generally synapse onto distinct neural targets to produce uniquely phased outputs of  
330 different behavioral, physiological, and endocrine rhythms, as recently described for sleep  
331 modulating dorsal clock neurons (46, 47)? We examined the patterns of synaptic outputs of the  
332 LN oscillator subgroups to determine how they coordinate the myriad circadian outputs.

333

334 As previously described (34) M, E1, E2, and E3 subgroups can be distinguished by their  
335 patterns of neuropil innervation. As expected, the M, E1, E2, and E3 subgroups differ  
336 significantly in terms of the brain areas where the majority of their neurites form chemical  
337 synapses. Though the M and E subgroups form output synapses within both the superior lateral  
338 protocerebrum (SLP) and superior medial protocerebrum (SMP), the M subgroups form the  
339 majority of their output synapses within the SLP, whereas the E groups form the majority of their  
340 output synapses within the SMP (Figure 5A and B). Though all seven E cells terminate largely  
341 within these two neuropils, they fall, once again, into three classes with regard to their neuropil

342 innervation. For example, E1 forms more output synapses on cells of the anterior ventrolateral  
343 protocerebrum (AVLP) than E2 or E3, E2 forms more synapses within the accessory medulla  
344 (aMe) than do E1 or E3, and E3 forms little to no synapses on neurons associated with either of  
345 these neuropils (Figure 5B).

346

347 The M subgroup's shared strong synaptic outputs represent only three distinct cell types (Figure  
348 6). Among these are five neurons within the SLP, which represent only two cell-types: three  
349 neurons annotated as SLP-316-R (Figure 6A) and two neurons annotated as SLP-403-R  
350 (Figure 6B). The sixth strong shared output is an SMP-associated neuron named SMP232-R  
351 (Figure 6C). The SLP-316-R neurons strongly resemble DN1ps currently missing from the  
352 hemibrain annotation, which send ventral projections alongside the dorsal projections of M cells  
353 and named ventral-contralateral DN1ps by Lamaze and colleagues (47) (Figure 6A and  
354 Supplemental Figure S6). Jaccard indices support the conclusion that these strong shared  
355 targets of M output are three distinct cell types (Figure 6D). Remarkably, all of the shared strong  
356 output targets of the M group form synapses back onto identified clock neurons (Figure 6A-C),  
357 including strong synaptic connections onto DN1ps and LPNs (Figure 6E). Thus, all the strong  
358 and shared output targets of the M group project back to the clock neuron network, thereby  
359 implicating them as nodes within the clock neuron network, either as currently unidentified  
360 clock-containing neurons or non-clock-containing neurons. The M group appears to be unique in  
361 the extent to which its strong shared synaptic targets reenter the clock neuron network, with  
362 only half or fewer of strong E1, E2, or E3 targets recurring to the clock network in this fashion  
363 (Figure 6F).

364

365 The E1 subgroup is characterized by many more strong/shared synaptic targets than the M  
366 subgroup (Compare Figure 4E and G) and these targets appear, based on Jaccard indices, to  
367 include many distinct cell types (Figure 7D). A minority of these E1 targets (16 out of 38) form

368 output synapses onto identified clock neurons within the hemibrain volume. Thus, the majority of  
369 the strong shared synaptic outputs of E1 do not immediately project back to the clock neuron  
370 network, in contrast to the uniform recurrence of strong shared M targets to the clock network  
371 (Figure 6A-E). Several of the targets receiving the strongest E1 synaptic input do form strong  
372 synaptic connections back onto clock neurons, particularly onto the E1 LNDs themselves, in  
373 addition to LPNs and DN1as (Figure 7E). Notably, the strong shared targets that recur to the  
374 clock neuron network do not display the anatomical hallmarks of any of the currently  
375 unannotated clock neurons in the hemibrain data set (e.g., Figure 7A-C). It therefore appears  
376 that neurons that do not themselves possess molecular clocks might nevertheless reside within  
377 the central timekeeping network and mediate polysynaptic connections between clock neurons.  
378

379 The E2 subgroup, like E1, forms strong shared synapses on a much larger number of neuronal  
380 targets than the M group (Compare Figure 4E and G) and these targets are a diverse array of  
381 cell types. Approximately half (14 out of 26) of the strong and shared E2 targets form synaptic  
382 connections onto identified clock neurons within the hemibrain (Figure 6F and 8A-C and E).  
383 Compared to the recurrent E1 clock connections, E2 forms synapses on identified clock  
384 neurons more broadly, forming connections with all currently identified clock neuron classes in  
385 the hemibrain volume, with the exception of the DN1a class (Figure 8E). Thus, the E2 group  
386 appears not only to represent a hub of strong direct inter-connectivity between identified clock  
387 neuron classes (Figure 1C), but also provides additional synaptic clock network inputs via their  
388 strong and shared synaptic targets (Figure 8E). As for E1, strong shared targets of E2 recurring  
389 to the clock network include neurons that do not share obvious anatomical affinity for currently  
390 unidentified clock neurons within the hemibrain dataset (e.g., Figure 8A-C). This suggests, once  
391 again, that the circadian timekeeping network of *Drosophila* includes neurons that do not  
392 themselves have a molecular clock.

393

394 Compared to the E1 and E2 groups, E3 forms approximately half the number of synaptic  
395 connections (Figure 4C and G). With regard to its shared strong outputs, the E3 subgroup  
396 forms strong shared synaptic connections onto only 16 neurons (Figure 3F and 4G), five of  
397 which form synapses onto identified clock neurons within the hemibrain (Figure 9E). E3 outputs  
398 onto clock neurons are limited to LNds and LPNs with most connections forming back onto E3  
399 LNds themselves (Figure 9A-C and E). This makes E3 similar to the E1 group in that they are  
400 characterized by strong shared output targets that form synapses directly back onto their E3  
401 inputs (Figure 7E and Figure 9E). Once again, the strong and shared output targets recurring to  
402 the clock network do not bear the anatomical hallmarks of clock neurons missing from the  
403 annotation (Figure 9A-C).

404

405 Taken together, our analysis indicates that the strong synaptic outputs of the four  
406 functional/connectomic LN subgroups, M, E1, E2, and E3, diverge onto distinct neural targets  
407 (Figure 4). Furthermore, many of these synaptic targets synapse back onto neurons within the  
408 clock neuron network, including all of the shared and strong output targets of the M subgroup.  
409 In contrast, approximately half of the synaptic targets of synaptic output from the E subgroups  
410 do not immediately recur to the clock network (Figure 6F). Not only does this implicate specific  
411 neuronal targets as conduits of circadian output, it also suggests that neurons not previously  
412 identified as “clock neurons” represent integral nodes within the neural network from which  
413 endogenous circadian timekeeping emerges (see discussion).

414

## 415 **Discussion**

416

### 417 **The Clock Neuron Network within the Hemibrain Volume**

418



419 Before discussing our connectomic analysis of the LN clock neuron classes, it is important to  
420 acknowledge the limitations of the dataset. The hemibrain represents a single hemisphere of the  
421 central brain and therefore does not contain all connections from the clock neuron cell bodies it  
422 contains. Given that the clock neuron network is highly likely to contain connections between  
423 contralateral neurons including clock neurons (48), our estimates of inter-clock connectivity will  
424 therefore not include these contralateral connections. Furthermore, recent work suggests that  
425 electrical synapses within the clock neuron network likely contribute to circadian timekeeping,  
426 (49), but these are not visible in the hemibrain data set (15). Thus, our analysis underestimates  
427 connectivity. In addition, clock neuron classes undergo pronounced daily morphological  
428 changes that are most likely accompanied by changes in the number and locations of synaptic  
429 connections (50-52). Thus, the hemibrain represents only one timepoint, within a cycle of  
430 changing synaptic connections (15). Finally, the hemibrain data set represents a single female  
431 fly, whereas the vast majority of experiments on the neural basis of circadian timekeeping have  
432 employed male flies. Thus, unexpected connectivity may be due to differences between the  
433 well-characterized clock neuron network of males and the less well-studied female network.

434

435 Though we are focusing our analysis on the LN clock neuron classes, we have omitted the I-  
436 LNvs. We have done so because the synaptic outputs of the I-LNvs are thought to occur in the  
437 contralateral accessory medulla (AMe) and much of their synaptic inputs are thought to be located  
438 in regions of the medulla that are not included in the hemibrain volume (48). We note, in this  
439 context, that the I-LNvs do not appear to make significant contributions to endogenous circadian  
440 timekeeping (26-28), which is the phenomenon we seek to illuminate here. Despite these  
441 limitations, the organizational principles uncovered in this study provide insights into clock  
442 network organization and are sure to generate a significant number of testable hypotheses  
443 regarding network function (see below).

444

445 **Connectomic Classes of LN Clock Neuron Mirror Previously Proposed Functional and**  
446 **Molecular LN Sub-Groups**

447

448 The lateral neuron classes are critical to maintain endogenous circadian rhythms (20, 24). An  
449 examination of genetic mosaics suggested that, within the LNs, the PDF expressing LNvs drive  
450 the morning peak of daily activity, whereas PDF negative LNds and 5<sup>th</sup> s-LNv drive the evening  
451 peak, leading to the designation of the former neurons as “Morning (M) Cells” and the latter as  
452 “Evening (E) Cells” (22, 29). Though named based on its anatomical similarity to the other LNv  
453 clock neurons in the larval brain (23, 33), there are now numerous observations suggesting that  
454 the 5<sup>th</sup>-s-LNv is functionally and anatomically distinct from the PDF expressing s-LNvs in the  
455 adult brain: the 4 *pdf+* sLNvs are functionally associated with morning activity whereas the 5<sup>th</sup>-s-  
456 LNv is associated with evening activity (22). Furthermore the 5<sup>th</sup> s-LNv shares connectivity  
457 patterns, neuropeptide expression, and features of cellular anatomy with one of the Cry-  
458 expressing LNds (30, 42, 53). Our connectomic analysis further supports the conclusion that the  
459 5<sup>th</sup> s-LNv is an LNd-like clock neuron that bears little resemblance, functionally or anatomically,  
460 to the PDF expressing s-LNvs.

461

462 Functional and anatomical analysis suggests that the LN neurons can be divided into four  
463 functional classes, M, E1, E2, and E3 and that the patterns of strong connectivity displayed by  
464 the LNs are in striking concordance with these divisions (30). Our connectomic analysis  
465 indicates that the functional differences characterizing these four groups of neurons appear to  
466 be written in the connectome: each receives a unique combination of strong synaptic inputs  
467 and, in turn, forms strong synaptic connections onto distinct post-synaptic targets. These results  
468 suggest that the functional subsets of LNs likely drive distinct behavioral and physiological  
469 outputs, rather than converging onto the same premotor, sleep, or endocrine centers.

470

471 In addition, our analysis supports the existence of an additional subgroup within the LNs,  
472 suggesting that the Cry- negative E3 class likely consists of two subgroups: LNd2 and LNd3,  
473 which share a large proportion of their strong synaptic inputs and outputs, and LNd1, which  
474 shares significantly fewer strong connections with the other two Cry- LNds (Figure 3E and F).  
475 Placing LNd1 into its own LNd subgroup aligns our connectomic LN divisions with a recent  
476 transcriptomic analysis of the clock neuron network that divided the LNds into four clusters: The  
477 two sNPF and Cry expressing LNds (LNd4 and LNd5, i.e., E1), the single ITP and Cry  
478 expressing LNd (LNd6, i.e. the E2 LNd), two NPF expressing LNds lacking Cry expression, and  
479 a single Cry- LNd that lacks NPF (41).

480

481 **The M group forms very few synaptic connections with other identified clock neuron**  
482 **classes in the hemibrain dataset.**

483

484 The s-LNvs of the M group, though they form medium strength connections with one another,  
485 are almost completely isolated from the other identified clock neurons within the hemibrain  
486 dataset (Figure 1C and 2H). Though this picture may ultimately underestimate of inter-clock  
487 connectivity if the strong shared SLP targets of M output (Figure 6A) are determined to be the  
488 DN1ps currently missing from the annotation (Supplemental Figure S7). The predicted synaptic  
489 inputs to the M group from the DN1ps (54-56) are not apparent in the hemibrain dataset, though  
490 this may again be a limitation of the current annotation in which approximately half of the DN1ps  
491 are unaccounted for. However, strong DN1p to s-LNv connections are lacking even if we  
492 consider the three strong M cell targets, the SLP316s, to be missing DN1ps, as these form  
493 synapses on DN1ps and LPNs, but not the M group (Supplemental Figure S7). Remarkably,  
494 there are no synaptic connections between the M and E1 groups, the latter of which was  
495 differentiated from E2 by the tight coupling of E1 molecular clocks to those of the M group (30).  
496 Thus, the strong coupling of M and E1 likely takes place through non-synaptic connections,

497 consistent with recent work suggesting that the M group mediates its influence over  
498 endogenous timekeeping via non-synaptic signaling mechanisms, most likely via the non-  
499 synaptic release of PDF peptide (38, 50).

500

501 Compared to the other LN subgroups, the M group forms the smallest number of synaptic  
502 connections (Figure 4C). This group is also unique among the LN groups by virtue of the fact  
503 that all of its shared strong synaptic output targets form strong synaptic connections onto clock  
504 neurons (DN1ps and LPNs) (Figure 6E). Thus, the strongest synaptic outputs of the M groups  
505 appear to be intimately associated with the clock neuron network, either as neurons directly  
506 linking different clock neuron classes, or as currently unidentified clock neurons within the  
507 hemibrain data set (see Supplemental Figure S7).

508

509 **The E1 and E2 groups are major conduits of synaptic output from the clock network.**

510

511 Compared to the other three LN functional groups, the E1 group forms the largest number of  
512 connections onto post-synaptic neurons (Figures 3F and 4C) and the majority of their strong  
513 and shared synaptic targets do not themselves form synapses onto identified clock neurons  
514 within the hemibrain data set. Of the minority of strong shared E1 targets that do synapse onto  
515 identified clock neurons, the majority form strong reciprocal connections with E1 itself (Figure  
516 7E and 10A). Thus, the E group most strongly coupled with the critical M group (30) also  
517 appears to be a major conduit of synaptic output from the clock neuron network.

518

519 Among the identified clock neurons within the hemibrain dataset, the E2 LNs (LNd6 and the 5<sup>th</sup>  
520 s-LNv) are clear outliers for synaptic connectivity with other clock neurons, forming strong  
521 synaptic connections onto E1 LNs and DN1ps. E2 LNs also receive strong synaptic inputs  
522 from DN1as and DN1ps and form strong connections with one another (Figure 1C). This strong

523 synaptic connectivity with other clock neurons may provide an explanation for the observation  
524 that the E2 group fails to synchronize its molecular clock with the M group when the clocks of  
525 the latter cells are slowed down, despite expressing the receptor for the M group's major  
526 circadian output peptide PDF (30). Synaptic communication from non-M pacemakers may  
527 prevent E2 clocks from synchronizing with those of the M cells.

528  
529 Like the strong shared synaptic targets of E1 LNds, the majority of E2 strong output targets do  
530 not synapse onto identified clock neurons. But, in contrast to E1, the minority of E2 targets that  
531 do form strong connections with identified clock neurons do so more broadly than clock  
532 recurrent E1 targets, forming strong synaptic connections onto the M group, E2, and the LPNs  
533 (Figure 8E). Though not as numerous as the synaptic partners of E1, E2 forms many more  
534 synaptic connections than either M or E3, and together E1 and E2 make up the bulk of synaptic  
535 output from the LN classes (Figure 4C and Supplemental Table S2). Thus, there appear to be  
536 two major circadian output conduits from the LN clock neurons within the hemibrain volume, one  
537 of which is tightly coupled to the M group and the other whose output is likely more strongly  
538 shaped by other clock neuron classes (30).

539  
540 **The E3 group is characterized by a pattern of strong synaptic output that is distinct from**  
541 **E1 and E2 and is synaptically isolated from other identified clock neurons.**

542  
543 The E3 LNds are distinct from the E1 and E2 groups, in that they form approximately half the  
544 number synaptic connections (Figure 4C). While clearly distinct from E1 and E2, the E3 group  
545 displays some similarity to the M group with respect to its connectivity to identified clock  
546 neurons in the hemibrain, forming very few connections with other clock classes while being  
547 interconnected by medium strength connections (Figure 1C). Among the identified clock  
548 neurons in the hemibrain, the strong output targets of E3 make strong reciprocal connections

549 back to E3, but not to other identified clock neuron classes, though they do form a few medium  
550 strength connections onto LPNs (Figure 9E). This sets E3 clearly apart from the other LN  
551 groups, all of which have strong synaptic targets that form strong synapses onto other clock  
552 neuron classes (Compare Figures 6E, 7E, 8E, and 9E). Thus, the E3 group appears to be  
553 uniquely isolated from other identified clock neuron classes for both direct and indirect synaptic  
554 connectivity.

555

556 The E3 group is unique among the LN clock neurons by virtue of its lacking CRY and PdfR  
557 expression (43, 57) and is therefore thought to be relatively isolated from both light/dark cycles  
558 (58) and PDF released from the LNvs. Indeed, the E3 group entrains its molecular clocks more  
559 readily to environmental temperature cycles than to light cycles (58) and does not synchronize  
560 with PDF expressing LNvs with slowed clocks (30). A close examination of E3 output pathways  
561 and the extent to which they converge or fail to converge on endocrine, sleep, and pre-motor  
562 centers will offer important insights into how light and temperature are integrated by the  
563 circadian system to entrain to environmental cycles of both light and temperature, the latter of  
564 which lag behind the former in natural environments.

565

566 **Neurons without endogenous molecular clocks are likely integral to the central circadian**  
567 **pacemaker network.**

568

569 The LN clock neuron classes are critical nodes of circadian timekeeping and are predicted to  
570 communicate directly with endocrine, sleep, and pre-motor centers to drive circadian outputs  
571 (10, 44) and with other clock neuron classes to coordinate network timekeeping (Reviewed by  
572 (11)). Thus, the LN classes are assumed to synapse upon other clock neurons to promote an  
573 endogenous sense of time and upon non-clock neurons to mediate daily changes in physiology

574 and behavior. Our analysis reveals the presence of a third type of LN clock output target,  
575 neurons that mediate connections between identified clock neurons (e.g., Figure 10B and C).  
576  
577 All four functional classes of LN (M, E1, E2, and E3) provide strong synaptic outputs onto  
578 neurons that, in turn, form strong synaptic connections onto identified clock neurons within the  
579 hemibrain volume (Figures 6E and F, 7E, 8E, and 9E). In the case of E1 and E3 much of the  
580 strong output recurring to the clock neuron network is reciprocal. For example, the strong  
581 targets of E1 outputs preferentially form strong connections back onto E1 LNds (Figure 7E). For  
582 all four groups of LN, strong outputs recurring to the clock network form either strong or medium  
583 strength synapses on the LPNs, implicating this class as a particularly rich hub for polysynaptic  
584 inter-clock connectivity (Figures 6E, 7E, 8E, 9E, and 10C; (13)).  
585  
586 Most of the neurons forming strong but indirect connections between identified clock neurons  
587 bear no resemblance to known clock neurons and are unlikely therefore to express the  
588 molecular circadian clock (e.g., Figure 10B and C). This finding suggests the need to expand  
589 our conception of what constitutes the fly's circadian clock network to include "non-clock"  
590 neurons that provide strong synaptic connections between the neurons with endogenous  
591 molecular circadian clocks (Figure 10D). What role might such "inter-clock-neurons" play within  
592 a circadian network? Networks underlying central pattern generators (CPGs) might offer clues.  
593  
594 Many CPG networks consist of neurons both with and without endogenous pacemaking activity  
595 (Reviewed by (59)). In such networks, connections between pacemaker neurons and follower  
596 neurons profoundly shape the time-course of rhythmic outputs, increase the precision of the  
597 central pattern generator, and provide a means for adjusting the phasing of its outputs (e.g.,  
598 (60-63)). Given the distributed daily phases of neural activity displayed by the various classes  
599 of clock neurons (64), the circadian pace-making network represents a central pattern

600 generator, albeit a lumberingly slow one. We hypothesize that the “inter-clock neurons” we’ve  
601 identified here (e.g., Figure 10 B and C) play significant roles in the determination of the  
602 circadian system’s endogenous period, precision, and phasing of rhythmic outputs, much like  
603 the follower neurons of central pattern generators described above.

604

605 This testable hypothesis is just one of many that emerge from the comprehensive view of clock  
606 connectomics afforded by the hemibrain data set (15). This remarkable picture of the synaptic  
607 connectivity displayed by clock neurons identified in this data set (Supplemental Tables 1 and  
608 2), in conjunction with the open-source neuro-informatic resources available to the field (e.g.,  
609 (16)) and the highly specific genetic tools available for the manipulation of identified neurons  
610 (e.g., (65)), will be the basis of a great deal of future work on the neural basis of circadian  
611 entrainment, timekeeping, and output.

612

## 613 **Methods**

### 614 **Connectome Data and Neuron Identification**

615

616 All of the data analyzed in this study come from the Hemibrain v1.2.1 dataset made publicly  
617 available by Janelia Research Campus (15). The data details a full connectome derived from  
618 EM sections of a significant portion of the right hemisphere of a female *Drosophila* brain and  
619 small portions of the left hemisphere. These data were collected from a wild type female brain  
620 reared under a 12-hour light, 12-hour dark cycle. The specimen was dissected at 5 days of age,  
621 1.5 hours after lights-on (15, 66).

622

623 Hemibrain data was accessed via neuPrint and Fly Brain Observatory. Visualization of  
624 morphological data was done in the Fly Brain Observatory web interface (NeuroNLP.Hemibrain)



625 while the retrieval of connectome data was done with the Neuprint python package  
626 (<https://github.com/connectome-neuprint/neuprint-python>). Analyses were aided by the use of  
627 the pandas (<https://pandas.pydata.org/>), seaborn (<https://seaborn.pydata.org/>), and superVenn  
628 (<https://github.com/gecko984/supervenn>) python packages.

629  
630 Each neuron in the database has a unique bodyID number and may also be identified with a  
631 cell-type name based on the name it was given in the literature or on its location and anatomy.  
632 Clock neurons were identified in the database from queries based on their known cell-type  
633 names. This means that there may be clock neurons that have been traced in the hemibrain, but  
634 if Janelia had not labeled them with their known cell name within the annotation, we have not  
635 included them as clock neurons here. The bodyID numbers for identified clock neurons were  
636 collected and used in the connectivity analyses to ensure consistency between platforms and  
637 future annotations.

638  
639 The full table of clock neurons, their unique body IDs, and their sequential labels are  
640 provided below. The hemibrain annotation does not sequentially label instances of the same cell  
641 type. The Fly Brain Observatory does sequentially label cell type instances, however, there is no  
642 guarantee that the sequential labeling will consistently correspond to the specific body IDs.  
643 Thus, we employed a sequential labeling on a single retrieval from FBO and have used this  
644 labeling consistently throughout the paper (Table 1).

645

646 **Table 1: Identification of Clock Neurons within the Hemibrain Volume**

| bodyId     | type  | Sequential label | subphase |
|------------|-------|------------------|----------|
| 2068801704 | s-LNv | s-LNv1           | M        |
| 1664980698 | s-LNv | s-LNv2           | M        |
| 2007068523 | s-LNv | s-LNv3           | M        |

|            |           |           |    |
|------------|-----------|-----------|----|
| 1975347348 | s-LNv     | s-LNv4    | M  |
| 5813056917 | LNd       | LNd4      | E1 |
| 5813021192 | LNd       | LNd5      | E1 |
| 5813069648 | LNd       | LNd6      | E2 |
| 511051477  | 5th s-LNv | 5th s-LNv | E2 |
| 296544364  | LNd       | LNd1      | E3 |
| 448260940  | LNd       | LNd2      | E3 |
| 5813064789 | LNd       | LNd3      | E3 |
| 356818551  | LPN       | LPN1      |    |
| 480029788  | LPN       | LPN2      |    |
| 450034902  | LPN       | LPN3      |    |
| 546977514  | LPN       | LPN4      |    |
| 264083994  | DN1a      | DN1a1     |    |
| 5813022274 | DN1a      | DN1a2     |    |
| 5813010153 | DN1pA     | DN1pA1    |    |
| 324846570  | DN1pA     | DN1pA2    |    |
| 325529237  | DN1pA     | DN1pA3    |    |
| 387944118  | DN1pA     | DN1pA4    |    |
| 387166379  | DN1pA     | DN1pA5    |    |
| 386834269  | DN1pB     | DN1pB1    |    |
| 5813071319 | DN1pB     | DN1pB2    |    |
| 1884625521 | I-LNv     | ILNv1     |    |
| 2065745704 | I-LNv     | ILNv2     |    |
| 5813001741 | I-LNv     | ILNv3     |    |
| 5813026773 | I-LNv     | ILNv4     |    |

647

648

## 649 **Morphological Data Visualization with FlyBrainLab**

650

651 FlyBrainLab (16) is available as a python environment and a user-friendly web interface. The

652 platform displays the hemibrain EM data and enables the analysis of the connectome data. The

653 morphology images in our paper were generated in FlyBrainLab.

## 654 **Connectivity Analysis**

655 Synaptic connectivity data were retrieved from the *Janelia* hemibrain dataset. Our analyses  
656 included the synapses to or from traced but unnamed fragments as well as select orphan  
657 bodies, in addition to synapses from full, traced, and named neurons. Fragments are partial or  
658 truncated neurons that mainly lie beyond or at the boundaries of the hemibrain section.  
659 Although fragments were often unidentified cell types, we felt their inclusion was warranted to  
660 obtain as accurate a picture as possible of the relative amounts of synaptic connectivity to and  
661 from clock neurons.

662

663 In keeping with Scheffer and colleagues (15), the synaptic strengths reported in our paper  
664 correspond to the number of postsynaptic densities counted on the postsynaptic neuron that are  
665 abutted by the presynaptic T-bar sites from the presynaptic neuron in question. Polyadic  
666 synapses, where a single presynaptic T-bar site contacts multiple postsynaptic sites, are  
667 common in the *Drosophila* brain (15, 66). Thus, synaptic weight for both the presynaptic and  
668 postsynaptic neuron is quantified as the postsynaptic density count.

669

670 We adopted the criteria from Scheffer *et. al* (15) to categorize connectivity strength. A weak  
671 connection is defined as a synaptic connection weight less than three. A medium strength  
672 connection is between three and nine synapses, while a strong connection is a strength equal to  
673 or greater than ten synapses. In our study, these criteria are applied to the total synapse count  
674 (i.e. the total number of postsynaptic densities) between two neurons rather than to the per-ROI  
675 synapse counts between them. Wherever applicable, the connection strength criteria used for  
676 any analysis or visualization is stated in the figure legend and in the main text.

677

678           The Sankey figures are based only on strong synaptic connections. Connectivity data  
679 were retrieved using the criteria for strong connections and exported into tables. The network  
680 structure of the clock connectome was graphed using the synaptic connectivity data retrieved  
681 from the hemibrain data and the networkX python package (<https://networkx.org>). Nodes are  
682 individual clock neurons and edges are labeled with the total synaptic connection weights from  
683 one neuron to another.

#### 684 **Jaccard Indices**

685 The Jaccard similarity coefficient is defined as the ratio of the intersection and the union of two  
686 sets.

$$687 \quad J(A, B) = \frac{A \cap B}{A \cup B}$$

688  
689 In the context of our study the Jaccard index represents the amount of overlap among the  
690 synaptic partners of two neurons. The Jaccard index is a number between 0 and 1, with 0  
691 indicating no overlap and with 1 indicating that the sets of synaptic partners for two neurons are  
692 identical.

#### 693 **Availability of Analysis Code**

694  
695           The data retrieval routines and the analyses used in this paper were done in the python  
696 coding language. We have made our scripts publicly available upon request in a GitHub  
697 repository.

698

#### 699 **Acknowledgements:**

700

701 This work was supported by grants from the National Institute of Neurological Disorders and  
702 Stroke R01NS077933 to O.T.S. and R01NS118012 to M.P.F. and O.T.S., start-up funds from  
703 Barnard College (M.P.F.) and the State of New York (O.T.S.), grants NIH K22 NS104187, NSF  
704 NeuroNex Award DBI-1707398, and The Gatsby Charitable Foundation to G.J.G, and Barnard  
705 SRI funds to K.L and A.M. We are grateful to Larry Abbot, Annika Barber and Michael Rosbash  
706 for helpful discussions and to Larry Abbot, Justin Blau, Abhilash Lakshman, Ashok Litwin-Kumar  
707 Paul Taghert, Aishwarya Ramakrishnan and Robert Veline for kindly providing comments on the  
708 manuscript. Figures 1A and 10A were created in Biorender.

709

710

## 711 **Figure Legends:**

712

713

## 714 **Main Figures**

715

716 **Figure 1. The circadian clock neuron network and identified clock neurons in the**  
717 **hemibrain.** (A) The circadian clock network is shown in both hemispheres. Currently identified  
718 cells are shown in color (s-LNvs red, l-LNvs light red, LNds in orange, DN1a in purple, a subset  
719 of DN1p in blue) and known clock cells not yet identified within the hemibrain connectome data  
720 are shown in gray (DN2, DN3, and a subset of DN1p). The *pars intercerebralis* (PI) and optic  
721 lobe (OL) are indicated in gray. (B) Identified clock neurons in the hemibrain. Neuropils are  
722 shown in gray. Color codes as indicated in (A). (C) Heatmap indicates synaptic connections  
723 strength among all identified circadian clock neurons, including weak (weight <3) connections.  
724 (D) The timekeeping lateral neurons that compose the morning (M) and evening (E) Oscillators:  
725 s-LNvs (M cells), and 5<sup>th</sup> s-LNv and LNds (E cells).

726

727 **Figure 2. Connectivity patterns of the s-LNvs.** (A-C). Synaptic connections of the four *pdf+* s-  
728 LNvs, s-LNv\_R\_1 through s-LNv\_R\_4. Neuronal morphology is shown in gray. In A and B,  
729 inputs to the s-LNvs are shown in blue, outputs are shown in magenta. (A) All connections,  
730 including non-clock cells, (B) Connections to/from clock cells only, excluding connections to s-  
731 LNvs, (C) Connections among the 4 *pdf+* s-LNvs. Input and output sides coincide and are  
732 indicated in green. (D-E) Sankey diagram indicating the strong synaptic partners of all s-LNvs,  
733 including the 5<sup>th</sup> s-LNv. The total weight of synapses formed by each cell with its inputs (D) or  
734 outputs (E) is shown. (D) Presynaptic partners (inputs) of s-LNvs. No shared connections were  
735 found between the *pdf+* s-LNvs and the 5<sup>th</sup> s-LNv. (E) Post synaptic partners (outputs) of s-  
736 LNvs. Only one cell (Body ID 571372889) receives synaptic input from the 5<sup>th</sup> s-LNv plus a *pdf+*

737 s-LNv. (F-G) Synaptic connections of the 5<sup>th</sup> s-LNv. (F) All connections, including non-clock  
738 cells, (G) Connections to clock cells only. (H) Connectivity map of the four *pdf+* s-LNvs.

739

740 **Figure 3. Connectivity patterns of the LNds.** (A-C). Synaptic connections of the six LNds.  
741 Neuronal morphology is shown in gray. In A and B, inputs to the s-LNvs are shown in blue,  
742 outputs are shown in magenta. (A) All connections, including non-clock cells, (B) Connections to  
743 clock cells only, excluding connections to LNds. Input and output sides coincide and are  
744 indicated in green. (C) Connections within LNds. (D) Connectivity map of the six LNds. (E-F)  
745 Sankey diagram indicating the strong synaptic partners of all LNds. The total weight of  
746 synapses formed by each cell with its inputs (E) or outputs (F) is shown. (E) Pre-synaptic  
747 partners of LNds. No shared connections were found between LNd1-3 and LNd4-6. Most of the  
748 shared connections are between LNd4 and LNd5 (X cells provide strong inputs to both). (F)  
749 Post synaptic partners of the LNds.

750

751 **Figure 4. M cells are homogeneous while E cells can be clustered in three distinct**  
752 **groups.** (A-B) Jaccard indices for overlap in synaptic partners of M and E cells. Only includes  
753 synaptic partners that make medium or strong connections. Higher index values indicate more  
754 similarity in either inputs (A) or outputs (B). (C) Total input and output Synapse counts for M and  
755 E cells. (D-E) Strong shared connections of the four *pdf+* s-LNvs. Only cells that share one  
756 connection with at least two M cells are shown. The strength (weight) of the connection is  
757 indicated. Only medium and strong connections are included. (D) The two cells that send strong  
758 connections to at least two M cells send strong connections to all 4. (E) The six cells that  
759 receive strong connections from at least two M cells receive strong connections from all 4. (F-G)  
760 Strong shared connections of the six LNds plus the 5<sup>th</sup> s-LNv (collectively referred to as E cells).  
761 Only cells that share a strong connection with at least two E cells are shown. The strength  
762 (weight) of the connection is indicated. Only medium and strong connections are included. (F)  
763 Cells that send strong connections to at least two E cells are included in the heatmap. (G) Cells  
764 that receive strong connections from at least two E cells are included in the heatmap.

765

766 **Figure 5. Neuropils innervated by M and E cells.** (A-B). Percentage of connections located in  
767 each of the indicated neuropils. Medium and strong connections are included. (A) Neuropils in  
768 which the outputs of each of the 4 *pdf+* s-LNvs are located. (B) Neuropils in which the outputs of  
769 each of the LNds and the 5th s-LNv are located.

770

771 **Figure 6. Strong shared outputs of M cells.** (A-C) The six cells that are strong shared outputs  
772 of the four M cells involve three different neuronal types (SPL316-R, SLP403-R, and SMP232-  
773 R). The M cells outputs onto each representative neuron of each type are shown in magenta.  
774 Representative target neurons are shown in green. (A) M cells contact three SPL316 neurons.  
775 Left, all four M cells are shown in gray and their contacts to 355453590 (neuronal morphology  
776 shown in green) are shown in magenta. Right: 355453590 is shown in gray and its outputs to  
777 clock cells are shown in magenta. (B) M cells contact two SPL403-R neurons. Left, all four M  
778 cells are shown in gray and their contacts to 325455002 (neuronal morphology shown in green)  
779 are shown in magenta. Right: 325455002 is shown in gray and its outputs to clock cells are  
780 shown in magenta. (C) M cells contact one SMP232-R neuron. Left, all four M cells are shown

781 in gray and their contacts to 325455002 (neuronal morphology shown in green) are shown in  
782 magenta. Right: 325455002 is shown in gray and its outputs to clock cells are shown in  
783 magenta. (D) Jaccard index of the six M cell shared output cells. The index is based on the  
784 similarity of their outputs, the more similar their outputs are the higher the index value. Y and x-  
785 axis indicate the cell body ID of each of the six cells. Their neuronal type is indicated to the left  
786 of the body ID on the y axis. Only indices  $\geq 0.01$  are shown. (E) All strong shared outputs of M  
787 cells in turn contact clock neurons. On the x-axis, the clock neurons that receive contacts from  
788 each cell are indicated. The values on the cells represent the weight of each connection.  
789 Medium and strong connections are included. (F) Percent of strong shared outputs of each  
790 neuronal class that in turn sends contacts to clock cells. Medium and strong connections are  
791 included. E1 = LNd4 and LNd5, E2 = LNd6 and the 5th s-LNv, E3= LNd1, LNd2 and LNd3.

792

793 **Figure 7. Strong shared outputs of E1.** (A-C) The cells that are strong shared outputs of E1  
794 involve multiple neuronal types. E1 outputs onto three representative neurons are shown. E1  
795 neurons (LNd4 and LNd5) are shown in gray in the left panels, where representative output  
796 neurons are shown in green. On the right panels, each representative cell is shown in gray and  
797 its contacts to clock cells are shown in magenta (A) E1 cells contact two SMP368-R neurons.  
798 Left, E1 neurons (shown in gray) contacts to SMP368-R neuron 390331583 (shown in green)  
799 are shown in magenta. (B) E1 cells contact two AVLP075-R neurons. Left, E1 neurons (shown  
800 in gray) contacts to AVLP075-R neuron 702152113 (shown in green) are shown in magenta. (C)  
801 E1 cells contact two SMP315-R neurons. Left, E1 neurons (shown in gray) contacts to SMP315-  
802 R neuron 5813040712 (shown in green) are shown in magenta. (D) Jaccard indices indicating  
803 overlap among the output synaptic partners of the top 10 E1 strong shared output cells. The  
804 index is based on the similarity of their outputs, the more similar their outputs are the higher the  
805 index value. Y and x-axis indicate the cell body ID of each of the six cells. Only indices  $\geq 0.01$   
806 are shown. (E) Most shared outputs of E1 cells that contact clock cells send strong contacts to  
807 both E1 neurons. On the x-axis, the clock neurons that receive contacts from each cell are  
808 indicated. The values on the cells represent the weight of each connection. Medium and strong  
809 connections are included.

810

811 **Figure 8. Strong shared outputs of E2.** (A-C) The cells that are strong shared outputs of E2  
812 involve multiple neuronal types. E2 outputs onto three representative neurons are shown. E2  
813 neurons (LNd6 and the 5th s-LNv) are shown in gray in the left panels, where representative  
814 output neurons are shown in green. On the right panels, each representative cell is shown in  
815 gray and its contacts to clock cells, if present, are shown in magenta (A) Left, E2 neurons  
816 (shown in gray) contacts to SMP368 neuron 329732855 (shown in green) are shown in  
817 magenta. (B) Left, E2 neurons (shown in gray) contacts to SLP249 neuron 356140100 (shown  
818 in green) are shown in magenta. (C) Left, E2 neurons (shown in gray) contacts to aMe22  
819 neuron 5813021192 (shown in green) are shown in magenta. (D) Jaccard indices for the  
820 outputs of the top 10 E2 strong shared output cells. The index is based on the similarity of their  
821 outputs, the more similar their outputs are the higher the index value. Y and x-axis indicate the  
822 cell body ID of each of the ten cells. One of the strong shared outputs of E2 is LNd4. Only  
823 indices  $\geq 0.01$  are shown. (E) Shared outputs of E2 that contact clock cells contact different  
824 clock subclasses. On the x-axis, the clock neurons that receive contacts from each cell are

825 indicated. The values on the cells represent the weight of each connection. Medium and strong  
826 connections are included.

827

828 **Figure 9. Strong shared outputs of E3.** (A-C) The cells that are strong shared outputs of E3  
829 involve multiple neuronal types. E3 outputs onto three representative neurons are shown. E3  
830 neurons (LNd1, LNd2, and LNd3) are shown in gray in the left panels, where representative  
831 output neurons are shown in green. On the right panels, each representative cell is shown in  
832 gray and its contacts to clock cells are shown in magenta. (A) Left, E3 neurons (shown in gray)  
833 contacts to SMP335 neuron 297243542 (shown in green) are shown in magenta. (B) Left, E3  
834 neurons (shown in gray) contacts to SMP486 neuron 327933679 (shown in green) are shown in  
835 magenta. (C) Left, E3 neurons (shown in gray) contacts to SMP334 neuron 360254108 (shown  
836 in green) are shown in magenta. (D) Jaccard indices for the outputs of the top 11 E3 strong  
837 shared output cells. The index is based on the similarity of their outputs, the more similar their  
838 outputs are the higher the index value. Y and x-axis indicate the cell body ID of each of the  
839 cells. Only 3 cells are strong shared outputs of all E3 cells (E3a+ E3b). 8 cells are strong shared  
840 targets of E3a only. Only indices  $\geq 0.01$  are shown. (E) Shared outputs of any two E3 cells that  
841 contact clock cells. On the x-axis, the clock neurons that receive contacts from each cell are  
842 indicated. The values on the cells represent the weight of each connection. Medium and strong  
843 connections are included.

844

845 **Figure 10. Connections within the clock neuron network.** (A) Combined weights of medium  
846 and strong connections among different classes of identified clock neurons. Arrows indicate the  
847 direction of the connection. Some classes, such as E2, are strongly interconnected, while other  
848 clusters are relatively isolated. (B) Representative strong shared output of E1 that in turn  
849 contacts clock neurons. E1 are indicated in gray, their strong shared target LHPV6m1 cell  
850 388881226 is indicated in green, and its strong target neurons DNA1 and 2 are indicated in  
851 magenta (the weight of output contacts is 19 and 10, respectively). (C) Representative strong  
852 shared output of E2 that in turn contacts clock neurons. E2 are indicated in gray, their strong  
853 shared target SMP223 cell 417143726 is indicated in green, and its strong target neurons LPN  
854 are indicated in magenta (the weight of output contacts is 14 to LPN, 18 to LPN2, and 20 to  
855 LPN3). (D) Summary of 'inter-clock' neurons providing strong poly synaptic connections  
856 between clock neurons.

857

858

## 859 **Supplementary Figures**

860

861 **Supplementary Figure 1. Connections of individual s-LNVs.** (A-D). Synaptic connections of  
862 each of the four *pdf+* s-LNVs, s-LNV1 (A), s-LNV2 (B), s-LNV3 (C) and s-LNV4 (D), either to all  
863 neurons (left columns), to other clock cells except s-LNVs (middle columns), or to other s-LNVs  
864 (right columns). Neuronal morphology is shown in gray. Inputs to the s-LNVs are shown in blue,  
865 outputs are shown in magenta. Body IDs of each s-LNV are indicated on the right.

866

867 **Supplementary Figure 2. Connections of individual LNds.** (A-F). Synaptic connections of  
868 each of the six LNds, LNd1 (A), LNd2 (B), LNd3 (C), LNd4 (D), LNd5 (E) and LNd6 (F) either to



869 all neurons (left columns), to other clock cells except LNds (middle columns), or to other LNds  
870 (right columns). Neuronal morphology is shown in gray. Inputs to the LNds are shown in blue,  
871 outputs of the LNds are shown in magenta. Body IDs of each LNd are indicated on the right.

872

873 **Supplementary Figure 3. Connections of E cell classes.** (A-C). Synaptic connections of the  
874 three E cell classes, E3a (A), E1 (B), and E2 (C) either to all neurons (left columns), to other  
875 clock cells except LNds (middle columns), or to other LNds (right columns). LNd1 alone (E3b) is  
876 shown in Suppl. Figure 2A. Neuronal morphology is shown in gray. Inputs to the E classes are  
877 shown in blue, outputs are shown in magenta (left and middle columns). Within each group  
878 (right columns), input and output sides coincide and are indicated in green.

879

880 **Supplementary Figure 4. Comparison of medium and strong inputs of 5<sup>th</sup> s-LNv relative**  
881 **to the *pdf+* s-LNvs and the LNds.** (A-B) Supervenn diagrams indicate the number of shared  
882 inputs between all combinations of neurons, either among the 5<sup>th</sup> s-LNv and the LNds (A) or  
883 among the 5<sup>th</sup> s-LNv and the *pdf+* s-LNvs (B). Each neuron is represented in a row, boxes in  
884 color indicate inputs to that neuron. The numbers on the right y-axis indicate the total number of  
885 neurons that provide input to that cell. For example, 74 neurons provide medium and strong  
886 inputs to LNd3. The numbers on the x-axis indicate the number of shared inputs between  
887 different combinations of cells.

888

889 **Supplementary Figure 5. Comparison of medium and strong outputs of 5<sup>th</sup> s-LNv relative**  
890 **to the *pdf+* s-LNvs and the LNds.** (A-B) Supervenn diagrams indicate the number of shared  
891 outputs between all combinations of neurons, either among the 5<sup>th</sup> s-LNv and the LNds (A) or  
892 among the 5<sup>th</sup> s-LNv and the *pdf+* s-LNvs (B). Each neuron is represented in a row, boxes in  
893 color indicate inputs to that neuron. The numbers on the right y-axis indicate the total number of  
894 neurons that are being contacted by a specific cell. For example, 172 neurons receive medium  
895 or strong contacts from LNd3. The numbers on the x-axis indicate the number of shared outputs  
896 between different combinations of cells.

897

898 **Supplementary Figure 6. Connections of individual strong shared outputs of s-LNvs.** (A-  
899 F). Synaptic connections of each of the six cells that receive strong shared inputs from all four  
900 *pdf+* s-LNvs. Each cell is indicated in gray. Inputs from clock neurons to each cell are indicated  
901 in blue, and outputs from each cell to any clock neurons are indicated in magenta. (A-C) Three  
902 SLP316 receive the strongest contacts from all *pdf+* s-LNvs and are indicated in gray. (D-E)  
903 Two SLP403 are indicated in gray. (F) SMP223 is indicated in gray.

904

905 **Supplementary Figure 7. Neuroanatomy of the three SLP316 cells and identified DN1s.**  
906 (A) Five DN1ps (green) that exhibit contralateral as well as dorsal projections have been  
907 identified, and are referred to as DN1pA. (B) Two DN1ps (magenta) that lack a contralateral or  
908 dorsal projection but extend ventrally and medially have been identified and are referred to as  
909 DN1pB. (C) The three SLP316 neurons (gray) have both dorsal and ventral projections and a  
910 short medial projection. (D) Overlap of DN1pA, DN1pB, and SLP316.

911

912

913 **References**

914

- 915 1. J. Aschoff, *Handbook of behavioral neurobiology, biological rhythms* (Plenum Press,  
916 New York, ed. 4, 1981).
- 917 2. J. S. Takahashi, Turek, F.W., Moore, R.Y., *Biological Rhythms, Handbook of Behavioral*  
918 *Neurobiology* (Plenum Press, New York, ed. 12, 2001).
- 919 3. E. D. Herzog, Neurons and networks in daily rhythms. *Nat Rev Neurosci* **8**, 790-802  
920 (2007).
- 921 4. E. D. Herzog, T. Hermanstynne, N. J. Smyllie, M. H. Hastings, Regulating the  
922 Suprachiasmatic Nucleus (SCN) Circadian Clockwork: Interplay between Cell-  
923 Autonomous and Circuit-Level Mechanisms. *Cold Spring Harb Perspect Biol* **9** (2017).
- 924 5. A. C. Liu *et al.*, Intercellular coupling confers robustness against mutations in the SCN  
925 circadian clock network. *Cell* **129**, 605-616 (2007).
- 926 6. E. D. Buhr, S. H. Yoo, J. S. Takahashi, Temperature as a universal resetting cue for  
927 mammalian circadian oscillators. *Science* **330**, 379-385 (2010).
- 928 7. M. H. Hastings, E. S. Maywood, M. Brancaccio, The Mammalian Circadian Timing  
929 System and the Suprachiasmatic Nucleus as Its Pacemaker. *Biology (Basel)* **8** (2019).
- 930 8. M. N. Nitabach, P. H. Taghert, Organization of the Drosophila circadian control circuit.  
931 *Curr Biol* **18**, R84-93 (2008).
- 932 9. O. T. Shafer, C. Helfrich-Forster, S. C. Renn, P. H. Taghert, Reevaluation of Drosophila  
933 melanogaster's neuronal circadian pacemakers reveals new neuronal classes. *J Comp*  
934 *Neurol* **498**, 180-193 (2006).
- 935 10. O. T. Shafer, A. C. Keene, The Regulation of Drosophila Sleep. *Curr Biol* **31**, R38-R49  
936 (2021).
- 937 11. M. Ahmad, W. Li, D. Top, Integration of Circadian Clock Information in the Drosophila  
938 Circadian Neuronal Network. *J Biol Rhythms* **36**, 203-220 (2021).
- 939 12. Z. Yao, A. M. Macara, K. R. Lelito, T. Y. Minosyan, O. T. Shafer, Analysis of functional  
940 neuronal connectivity in the Drosophila brain. *Journal of neurophysiology* **108**, 684-696  
941 (2012).
- 942 13. N. Reinhard *et al.*, The lateral posterior clock neurons of Drosophila melanogaster  
943 express three neuropeptides and have multiple connections within the circadian clock  
944 network and beyond. *J Comp Neurol* 10.1002/cne.25294 (2021).
- 945 14. N. Kasthuri *et al.*, Saturated Reconstruction of a Volume of Neocortex. *Cell* **162**, 648-661  
946 (2015).
- 947 15. L. K. Scheffer *et al.*, A connectome and analysis of the adult Drosophila central brain.  
948 *Elife* **9** (2020).
- 949 16. A. A. Lazar, T. Liu, M. K. Turkcan, Y. Zhou, Accelerating with FlyBrainLab the discovery  
950 of the functional logic of the Drosophila brain in the connectomic and synaptomic era.  
951 *Elife* **10** (2021).
- 952 17. C. Helfrich-Forster, Neurobiology of the fruit fly's circadian clock. *Genes Brain Behav* **4**,  
953 65-76 (2005).
- 954 18. C. Helfrich-Forster *et al.*, The lateral and dorsal neurons of Drosophila melanogaster:  
955 new insights about their morphology and function. *Cold Spring Harb Symp Quant Biol*  
956 **72**, 517-525 (2007).
- 957 19. C. Helfrich-Forster *et al.*, Development and morphology of the clock-gene-expressing  
958 lateral neurons of Drosophila melanogaster. *J Comp Neurol* **500**, 47-70 (2007).
- 959 20. S. C. Renn, J. H. Park, M. Rosbash, J. C. Hall, P. H. Taghert, A pdf neuropeptide gene  
960 mutation and ablation of PDF neurons each cause severe abnormalities of behavioral  
961 circadian rhythms in Drosophila. *Cell* **99**, 791-802 (1999).

- 962 21. J. H. Park *et al.*, Differential regulation of circadian pacemaker output by separate clock  
963 genes in *Drosophila*. *Proc Natl Acad Sci U S A* **97**, 3608-3613 (2000).
- 964 22. B. Grima, E. Chelot, R. Xia, F. Rouyer, Morning and evening peaks of activity rely on  
965 different clock neurons of the *Drosophila* brain. *Nature* **431**, 869-873 (2004).
- 966 23. D. Rieger, O. T. Shafer, K. Tomioka, C. Helfrich-Forster, Functional analysis of circadian  
967 pacemaker neurons in *Drosophila melanogaster*. *J Neurosci* **26**, 2531-2543 (2006).
- 968 24. C. Helfrich-Forster, Robust circadian rhythmicity of *Drosophila melanogaster* requires  
969 the presence of lateral neurons: a brain-behavioral study of disconnected mutants. *J*  
970 *Comp Physiol A* **182**, 435-453 (1998).
- 971 25. C. Helfrich-Forster, The period clock gene is expressed in central nervous system  
972 neurons which also produce a neuropeptide that reveals the projections of circadian  
973 pacemaker cells within the brain of *Drosophila melanogaster*. *Proc Natl Acad Sci U S A*  
974 **92**, 612-616 (1995).
- 975 26. Z. Yang, A. Sehgal, Role of molecular oscillations in generating behavioral rhythms in  
976 *Drosophila*. *Neuron* **29**, 453-467 (2001).
- 977 27. O. T. Shafer, M. Rosbash, J. W. Truman, Sequential nuclear accumulation of the clock  
978 proteins period and timeless in the pacemaker neurons of *Drosophila melanogaster*. *J*  
979 *Neurosci* **22**, 5946-5954 (2002).
- 980 28. O. T. Shafer, P. H. Taghert, RNA-interference knockdown of *Drosophila* pigment  
981 dispersing factor in neuronal subsets: the anatomical basis of a neuropeptide's circadian  
982 functions. *PLoS One* **4**, e8298 (2009).
- 983 29. D. Stoleru, Y. Peng, J. Agosto, M. Rosbash, Coupled oscillators control morning and  
984 evening locomotor behaviour of *Drosophila*. *Nature* **431**, 862-868 (2004).
- 985 30. Z. Yao, O. T. Shafer, The *Drosophila* circadian clock is a variably coupled network of  
986 multiple peptidergic units. *Science* **343**, 1516-1520 (2014).
- 987 31. M. Schlichting, M. M. Diaz, J. Xin, M. Rosbash, Neuron-specific knockouts indicate the  
988 importance of network communication to *Drosophila* rhythmicity. *Elife* **8** (2019).
- 989 32. R. Delventhal *et al.*, Dissection of central clock function in *Drosophila* through cell-  
990 specific CRISPR-mediated clock gene disruption. *Elife* **8** (2019).
- 991 33. M. Kaneko, J. C. Hall, Neuroanatomy of cells expressing clock genes in *Drosophila*:  
992 transgenic manipulation of the period and timeless genes to mark the perikarya of  
993 circadian pacemaker neurons and their projections. *J Comp Neurol* **422**, 66-94 (2000).
- 994 34. F. K. Schubert, N. Hagedorn, T. Yoshii, C. Helfrich-Forster, D. Rieger, Neuroanatomical  
995 details of the lateral neurons of *Drosophila melanogaster* support their functional role in  
996 the circadian system. *J Comp Neurol* **526**, 1209-1231 (2018).
- 997 35. S. Malpel, A. Klarsfeld, F. Rouyer, Larval optic nerve and adult extra-retinal  
998 photoreceptors sequentially associate with clock neurons during *Drosophila* brain  
999 development. *Development* **129**, 1443-1453 (2002).
- 1000 36. C. Helfrich-Forster *et al.*, The extraretinal eyelet of *Drosophila*: development,  
1001 ultrastructure, and putative circadian function. *J Neurosci* **22**, 9255-9266 (2002).
- 1002 37. C. Helfrich-Förster, Development of pigment-dispersing hormone-immunoreactive  
1003 neurons in the nervous system of *Drosophila melanogaster*. *Journal of Comparative*  
1004 *Neurology* **380**, 335-354 (1997).
- 1005 38. K. Yasuyama, I. A. Meinertzhagen, Synaptic connections of PDF-immunoreactive lateral  
1006 neurons projecting to the dorsal protocerebrum of *Drosophila melanogaster*. *J Comp*  
1007 *Neurol* **518**, 292-304 (2010).
- 1008 39. D. Rieger, R. Stanewsky, C. Helfrich-Forster, Cryptochrome, compound eyes, Hofbauer-  
1009 Buchner eyelets, and ocelli play different roles in the entrainment and masking pathway  
1010 of the locomotor activity rhythm in the fruit fly *Drosophila melanogaster*. *J Biol Rhythms*  
1011 **18**, 377-391 (2003).

- 1012 40. M. T. Li *et al.*, Hub-organized parallel circuits of central circadian pacemaker neurons for  
1013 visual photoentrainment in *Drosophila*. *Nat Commun* **9**, 4247 (2018).
- 1014 41. D. Ma *et al.*, A transcriptomic taxonomy of *Drosophila* circadian neurons around the  
1015 clock. *Elife* **10** (2021).
- 1016 42. H. A. D. Johard *et al.*, Peptidergic clock neurons in *Drosophila*: Ion transport peptide and  
1017 short neuropeptide F in subsets of dorsal and ventral lateral neurons. *The Journal of*  
1018 *Comparative Neurology* **516**, 59-73 (2009).
- 1019 43. S. H. Im, W. Li, P. H. Taghert, PDFR and CRY signaling converge in a subset of clock  
1020 neurons to modulate the amplitude and phase of circadian behavior in *Drosophila*. *PLoS*  
1021 *One* **6**, e18974 (2011).
- 1022 44. A. N. King, A. Sehgal, Molecular and circuit mechanisms mediating circadian clock  
1023 output in the *Drosophila* brain. *Eur J Neurosci* **51**, 268-281 (2020).
- 1024 45. X. Liang *et al.*, Morning and Evening Circadian Pacemakers Independently Drive  
1025 Premotor Centers via a Specific Dopamine Relay. *Neuron* **102**, 843-857 e844 (2019).
- 1026 46. F. Guo, M. Holla, M. M. Diaz, M. Rosbash, A Circadian Output Circuit Controls Sleep-  
1027 Wake Arousal in *Drosophila*. *Neuron* **100**, 624-635 e624 (2018).
- 1028 47. A. Lamaze, P. Kratschmer, K. F. Chen, S. Lowe, J. E. C. Jepson, A Wake-Promoting  
1029 Circadian Output Circuit in *Drosophila*. *Curr Biol* **28**, 3098-3105 e3093 (2018).
- 1030 48. C. Helfrich-Forster *et al.*, The lateral and dorsal neurons of *Drosophila melanogaster*:  
1031 new insights about their morphology and function. *Cold Spring Harb Symp Quant Biol*  
1032 **72**, 517-525 (2007).
- 1033 49. A. Ramakrishnan, V. Sheeba, Gap junction protein Innexin2 modulates the period of  
1034 free-running rhythms in *Drosophila melanogaster*. *iScience* **24**, 103011 (2021).
- 1035 50. M. P. Fernandez, J. Berni, M. F. Ceriani, Circadian remodeling of neuronal circuits  
1036 involved in rhythmic behavior. *PLoS Biol* **6**, e69 (2008).
- 1037 51. J. M. Duhart *et al.*, Circadian Structural Plasticity Drives Remodeling of E Cell Output.  
1038 *Curr Biol* **30**, 5040-5048 e5045 (2020).
- 1039 52. B. J. Song, S. J. Sharp, D. Rogulja, Daily rewiring of a neural circuit generates a  
1040 predictive model of environmental light. *Sci Adv* **7** (2021).
- 1041 53. X. Liang, T. E. Holy, P. H. Taghert, A Series of Suppressive Signals within the  
1042 *Drosophila* Circadian Neural Circuit Generates Sequential Daily Outputs. *Neuron* **94**,  
1043 1173-1189 e1174 (2017).
- 1044 54. F. Guo *et al.*, Circadian neuron feedback controls the *Drosophila* sleep--activity profile.  
1045 *Nature* **536**, 292-297 (2016).
- 1046 55. S. Yadlapalli *et al.*, Circadian clock neurons constantly monitor environmental  
1047 temperature to set sleep timing. *Nature* **555**, 98-102 (2018).
- 1048 56. M. P. Fernandez *et al.*, Sites of Circadian Clock Neuron Plasticity Mediate Sensory  
1049 Integration and Entrainment. *Curr Biol* **30**, 2225-2237 e2225 (2020).
- 1050 57. T. Yoshii, T. Todo, C. Wulbeck, R. Stanewsky, C. Helfrich-Forster, Cryptochrome is  
1051 present in the compound eyes and a subset of *Drosophila*'s clock neurons. *J Comp*  
1052 *Neurol* **508**, 952-966 (2008).
- 1053 58. T. Yoshii, C. Hermann, C. Helfrich-Forster, Cryptochrome-positive and -negative clock  
1054 neurons in *Drosophila* entrain differentially to light and temperature. *J Biol Rhythms* **25**,  
1055 387-398 (2010).
- 1056 59. E. Marder, D. Bucher, D. J. Schulz, A. L. Taylor, Invertebrate central pattern generation  
1057 moves along. *Curr Biol* **15**, R685-699 (2005).
- 1058 60. A. I. Selverston, J. P. Miller, Mechanisms underlying pattern generation in lobster  
1059 stomatogastric ganglion as determined by selective inactivation of identified neurons. I.  
1060 Pyloric system. *Journal of neurophysiology* **44**, 1102-1121 (1980).

- 1061 61. A. L. Weaver, R. C. Roffman, B. J. Norris, R. L. Calabrese, A role for compromise:  
1062 synaptic inhibition and electrical coupling interact to control phasing in the leech  
1063 heartbeat CpG. *Front Behav Neurosci* **4** (2010).
- 1064 62. F. Nadim, S. Zhao, L. Zhou, A. Bose, Inhibitory feedback promotes stability in an  
1065 oscillatory network. *J Neural Eng* **8**, 065001 (2011).
- 1066 63. L. K. Purvis, T. M. Wright, J. C. Smith, R. J. Butera, Significance of pacemaker vs. non-  
1067 pacemaker neurons in an excitatory rhythmic network. *Conf Proc IEEE Eng Med Biol*  
1068 *Soc* **2006**, 607-608 (2006).
- 1069 64. X. Liang, T. E. Holy, P. H. Taghert, Synchronous *Drosophila* circadian pacemakers  
1070 display nonsynchronous Ca(2)(+) rhythms in vivo. *Science* **351**, 976-981 (2016).
- 1071 65. H. Dionne, K. L. Hibbard, A. Cavallaro, J. C. Kao, G. M. Rubin, Genetic Reagents for  
1072 Making Split-GAL4 Lines in *Drosophila*. *Genetics* **209**, 31-35 (2018).
- 1073 66. B. K. Hulse *et al.*, A connectome of the *Drosophila* central complex reveals network  
1074 motifs suitable for flexible navigation and context-dependent action selection. *Elife* **10**  
1075 (2021).  
1076

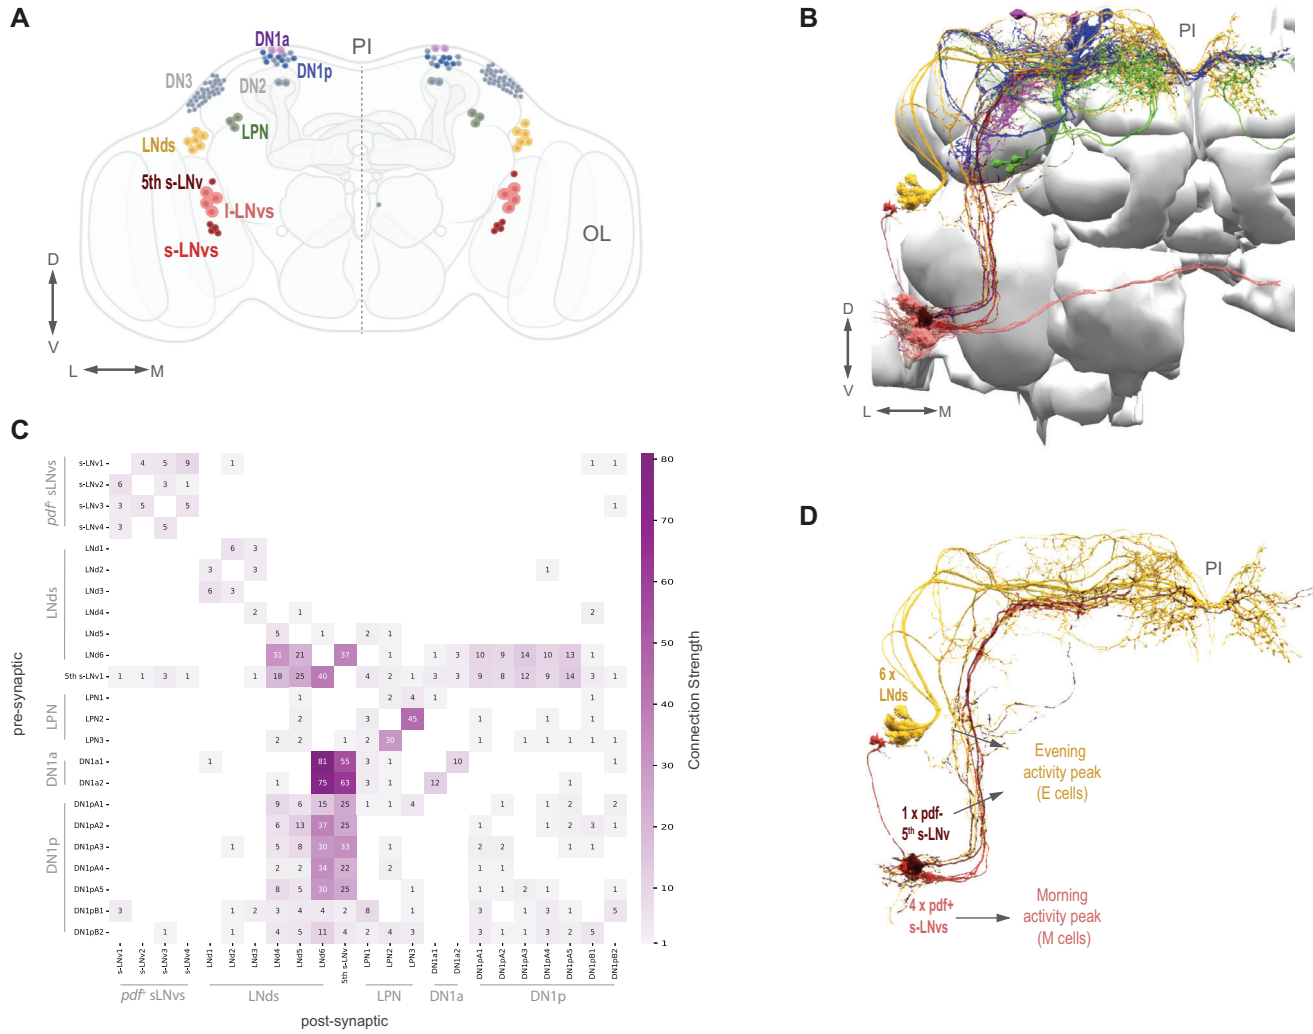

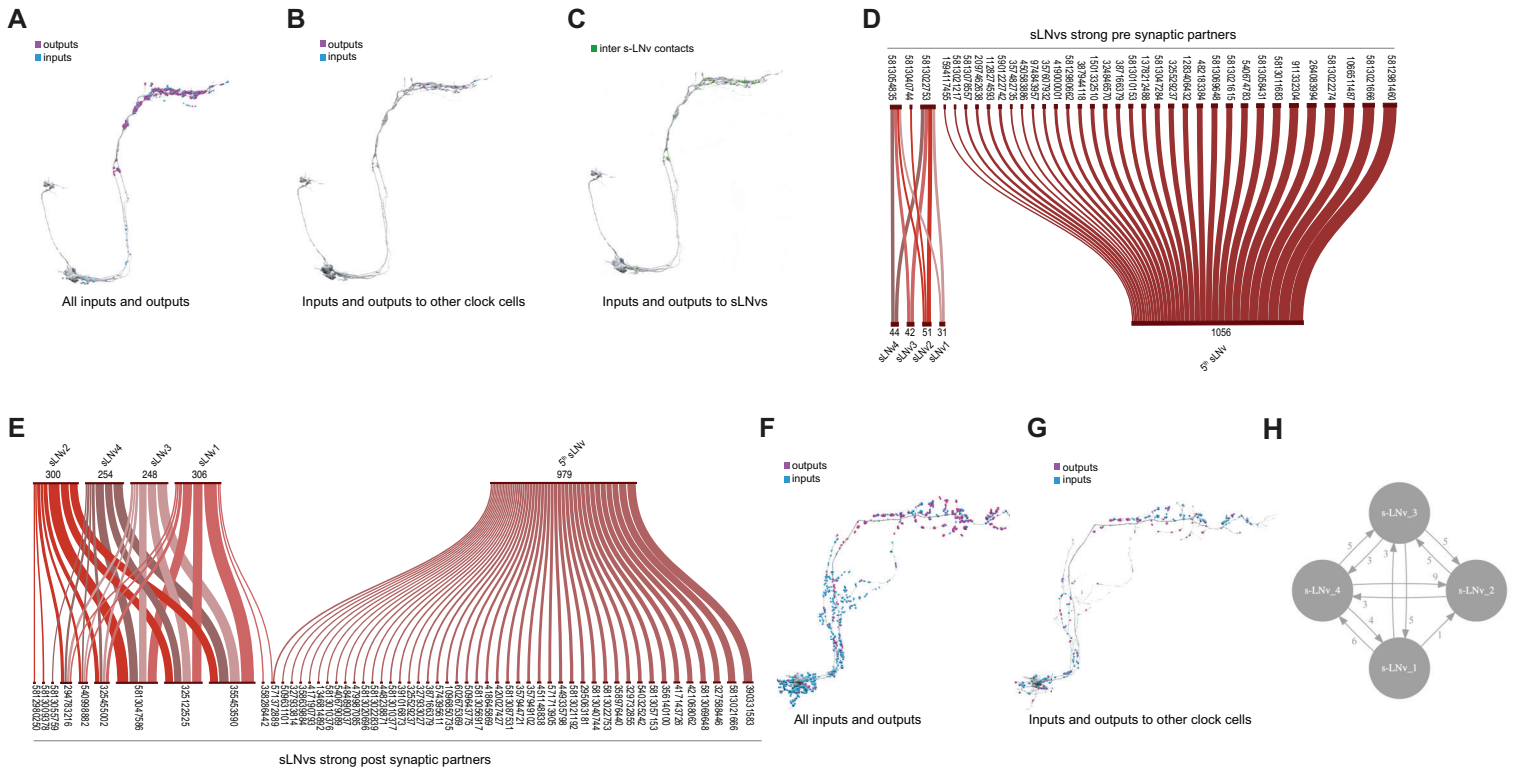

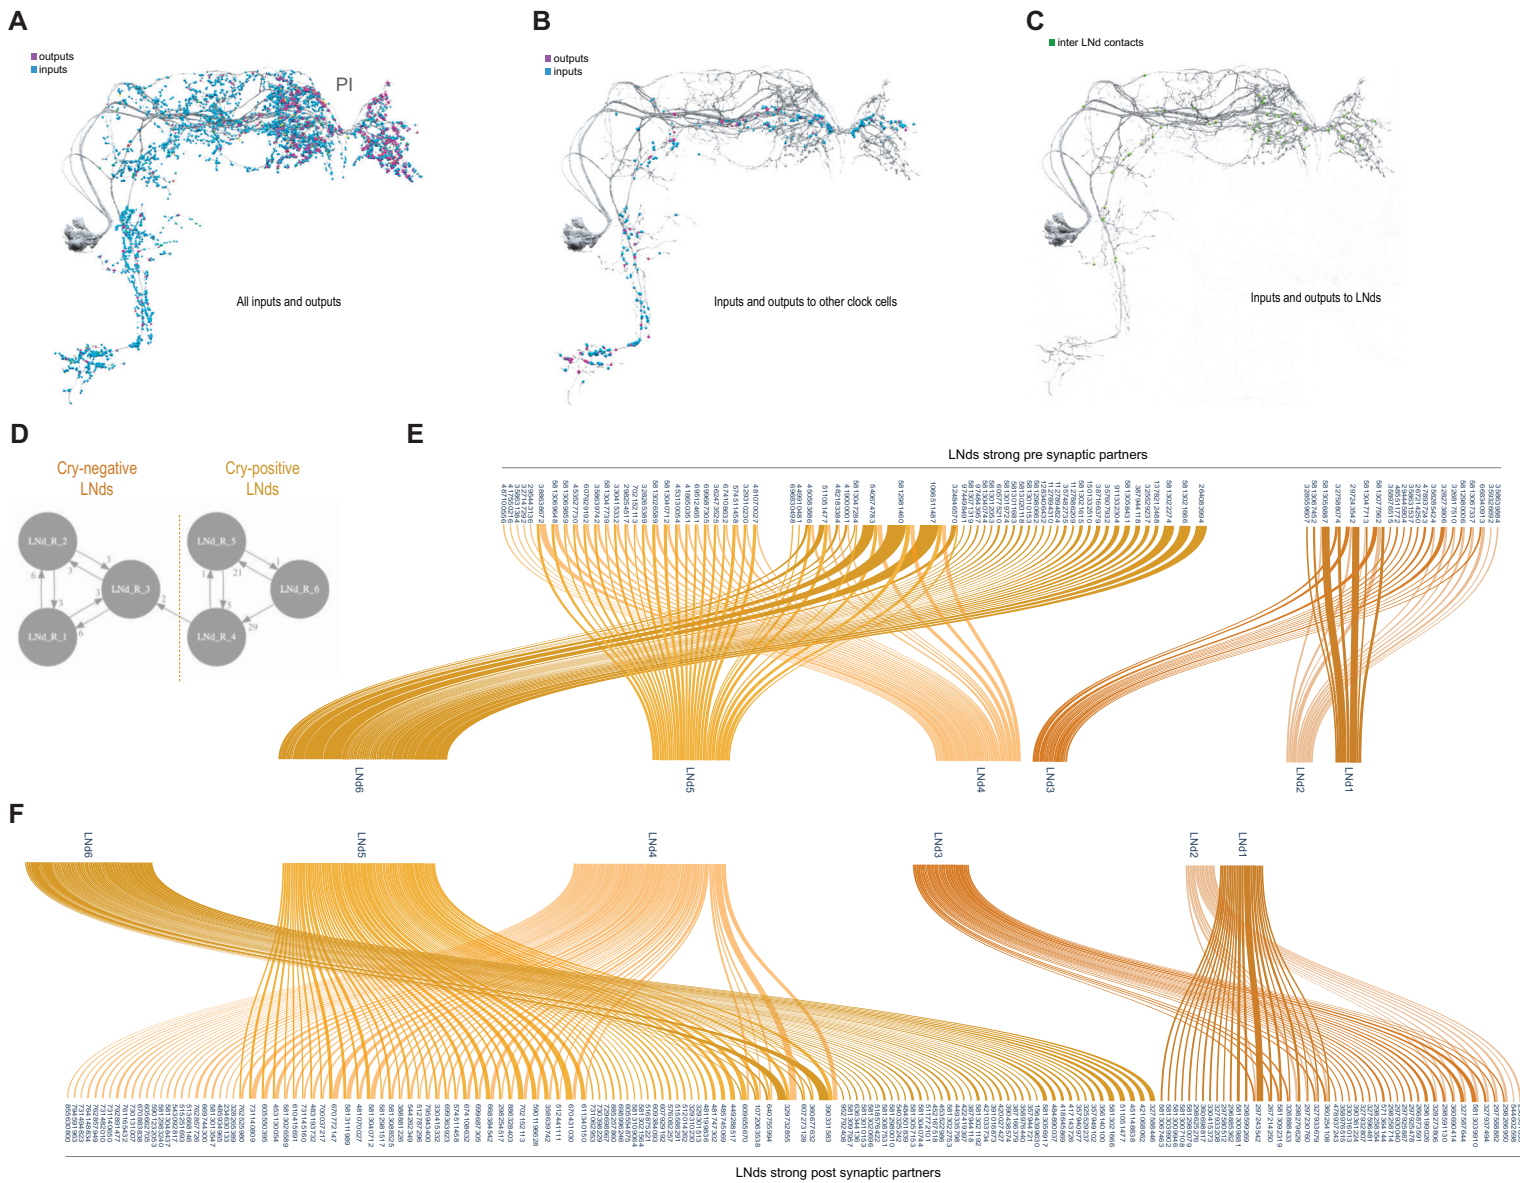



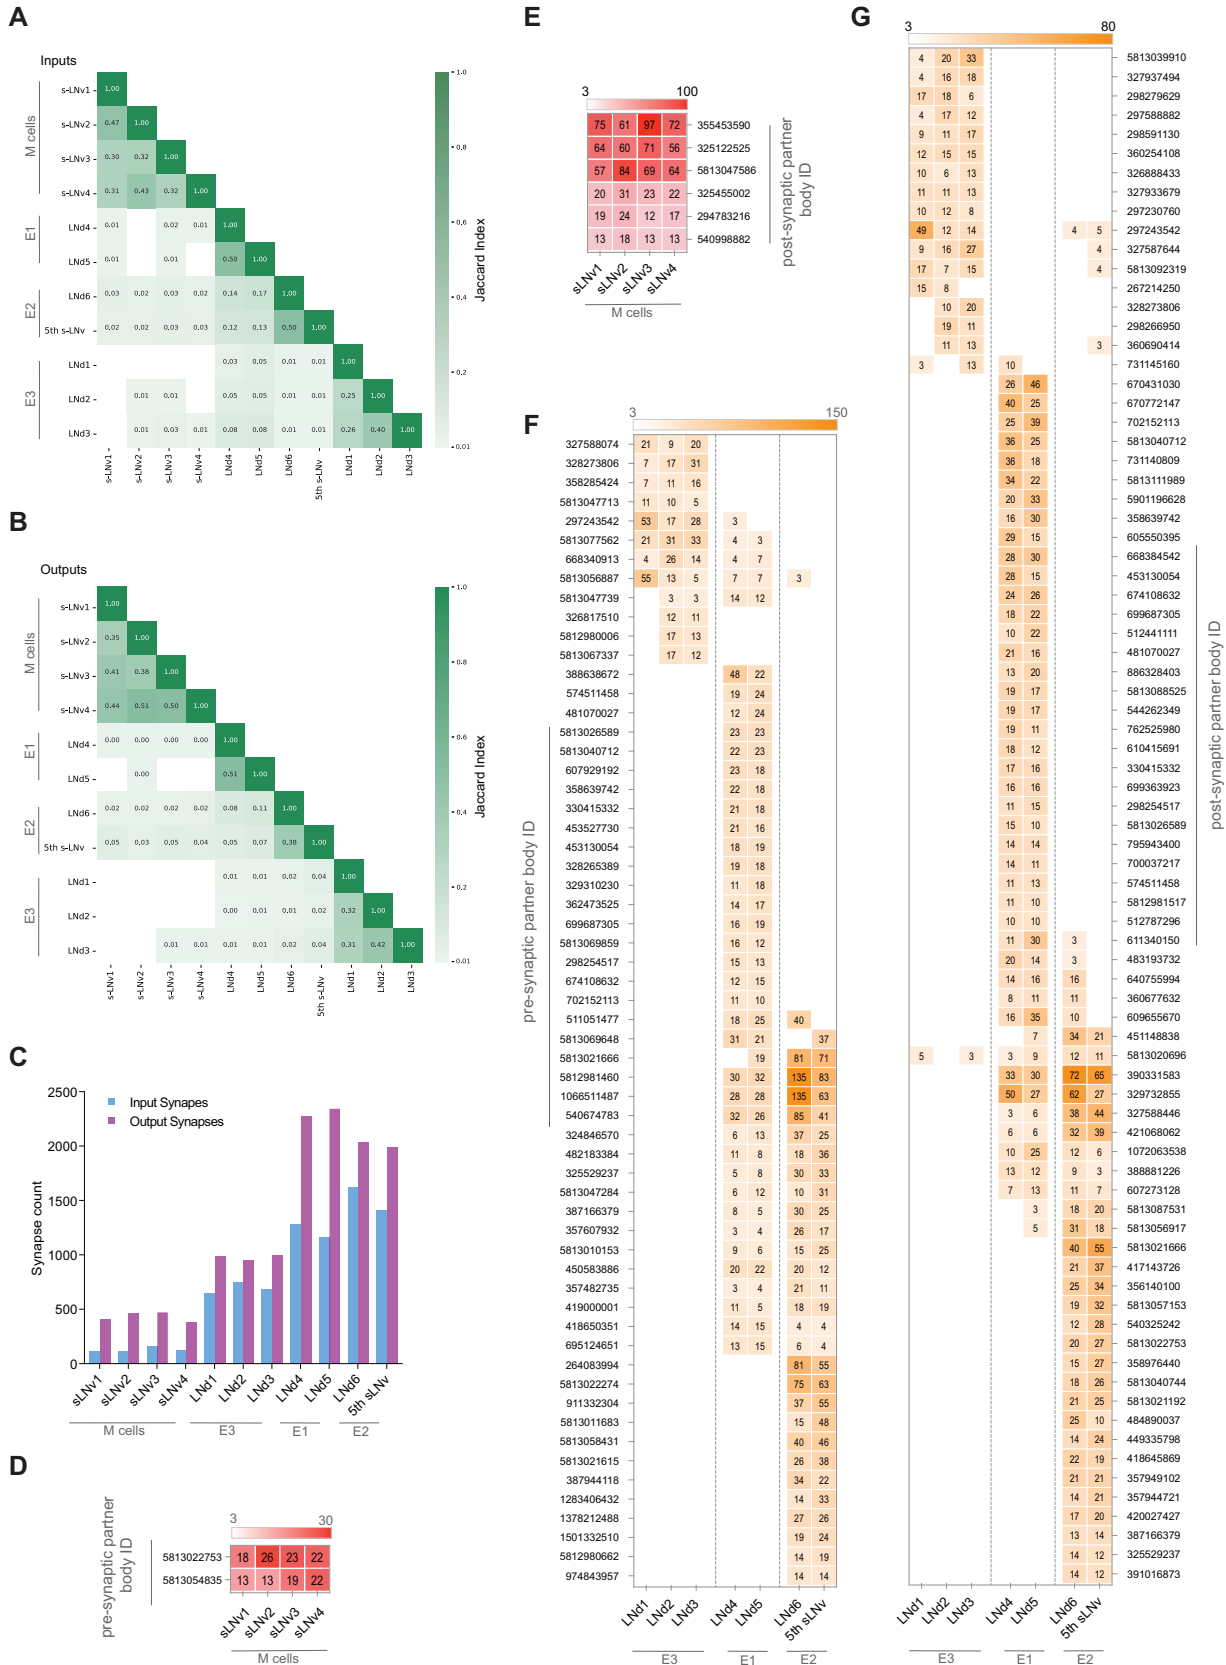

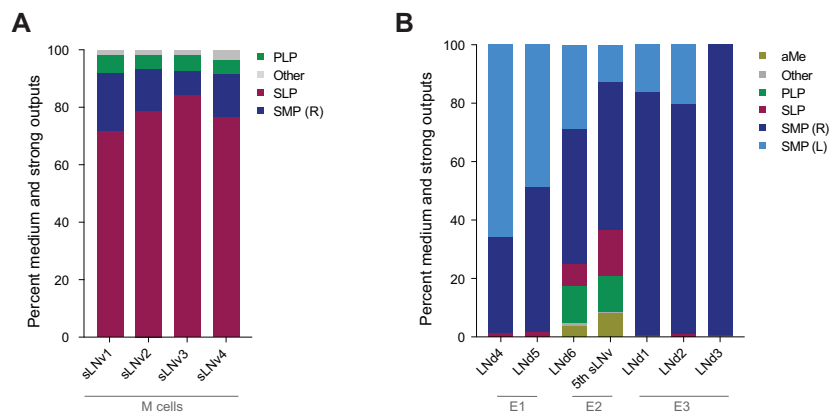

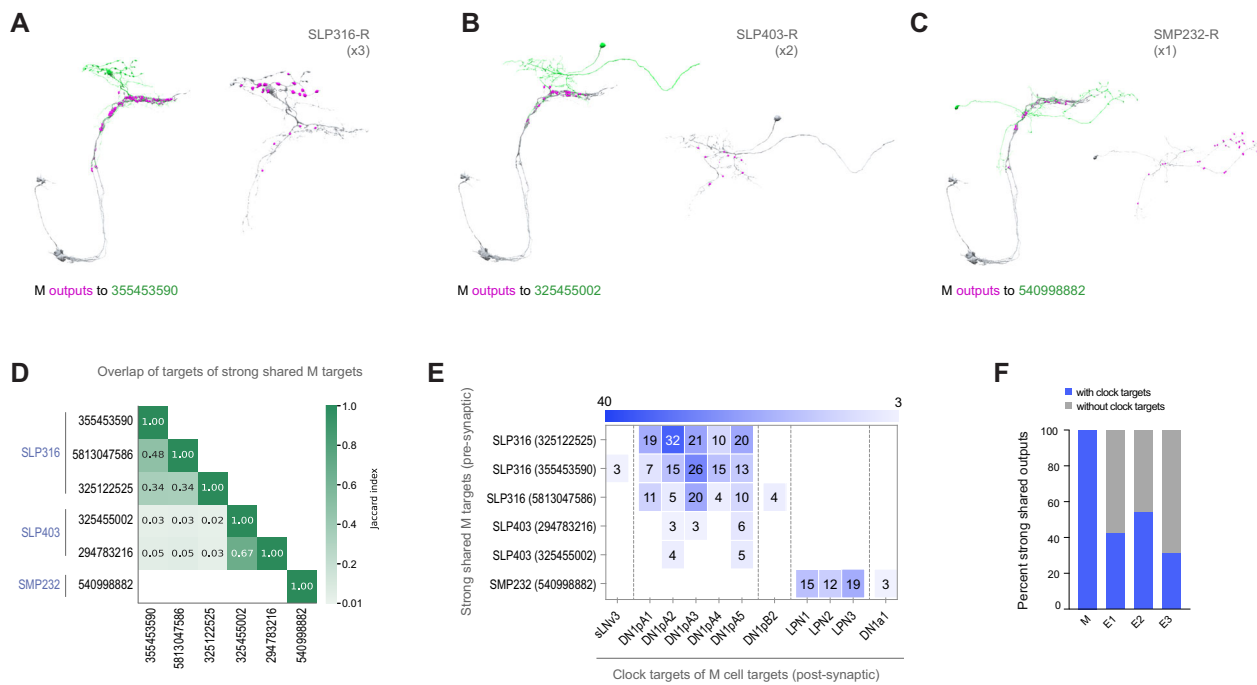

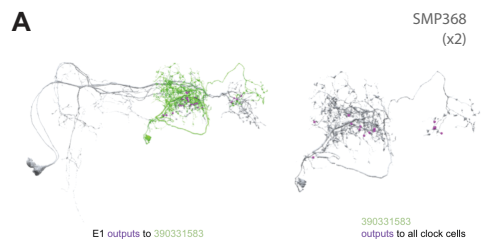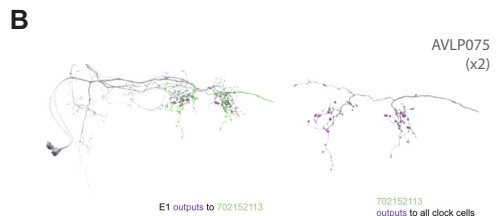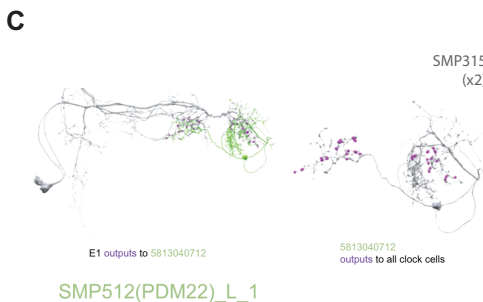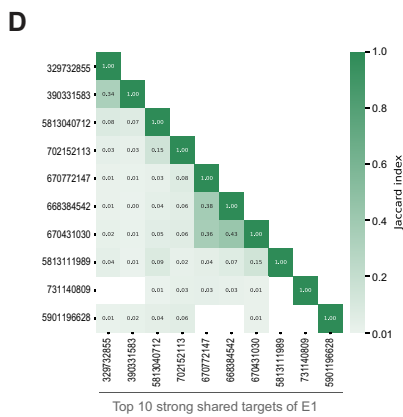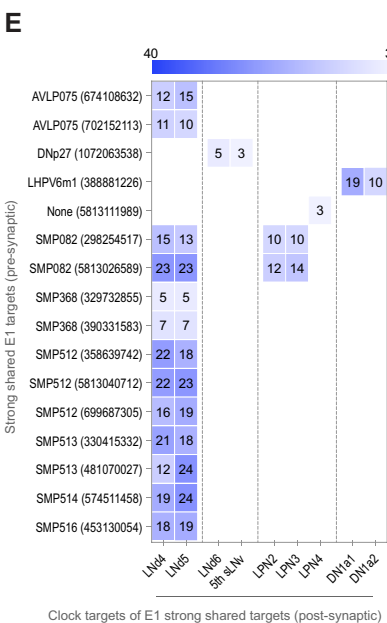

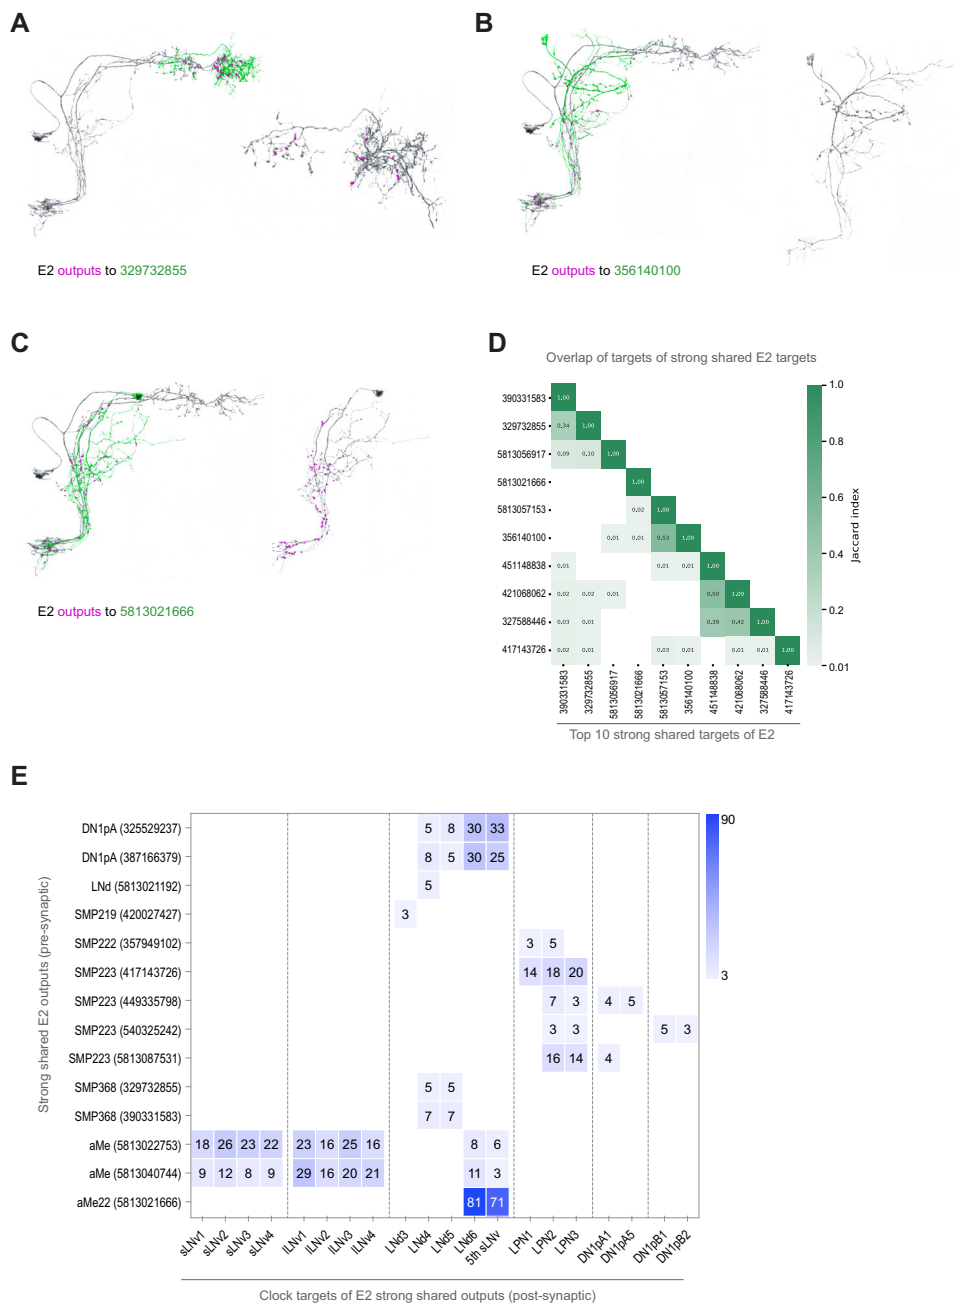

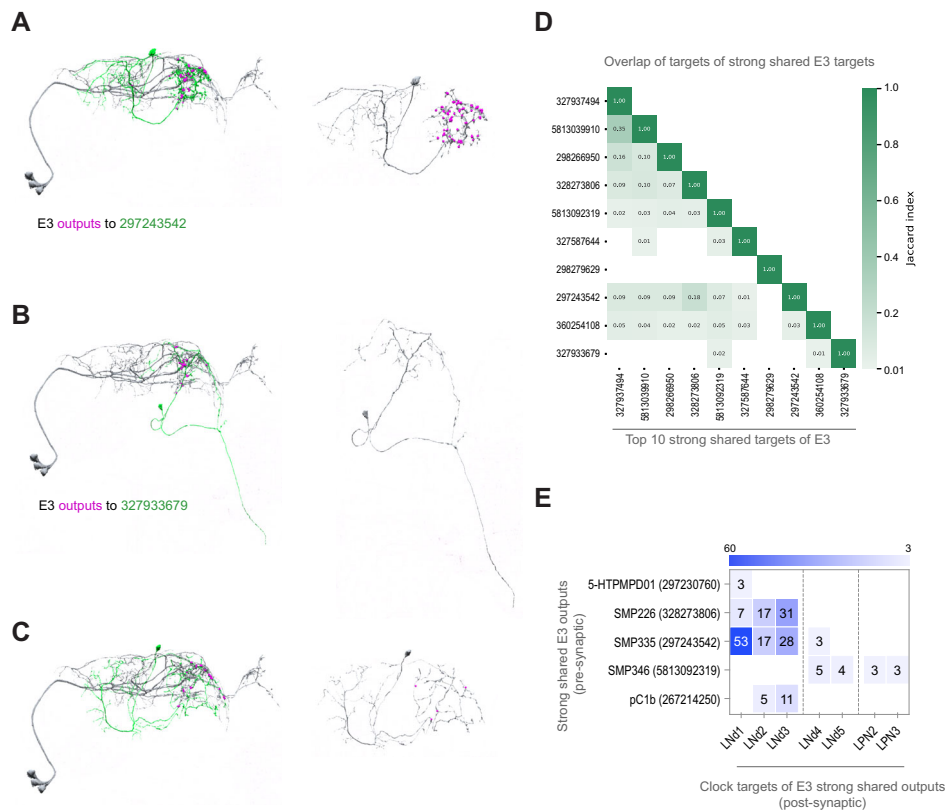

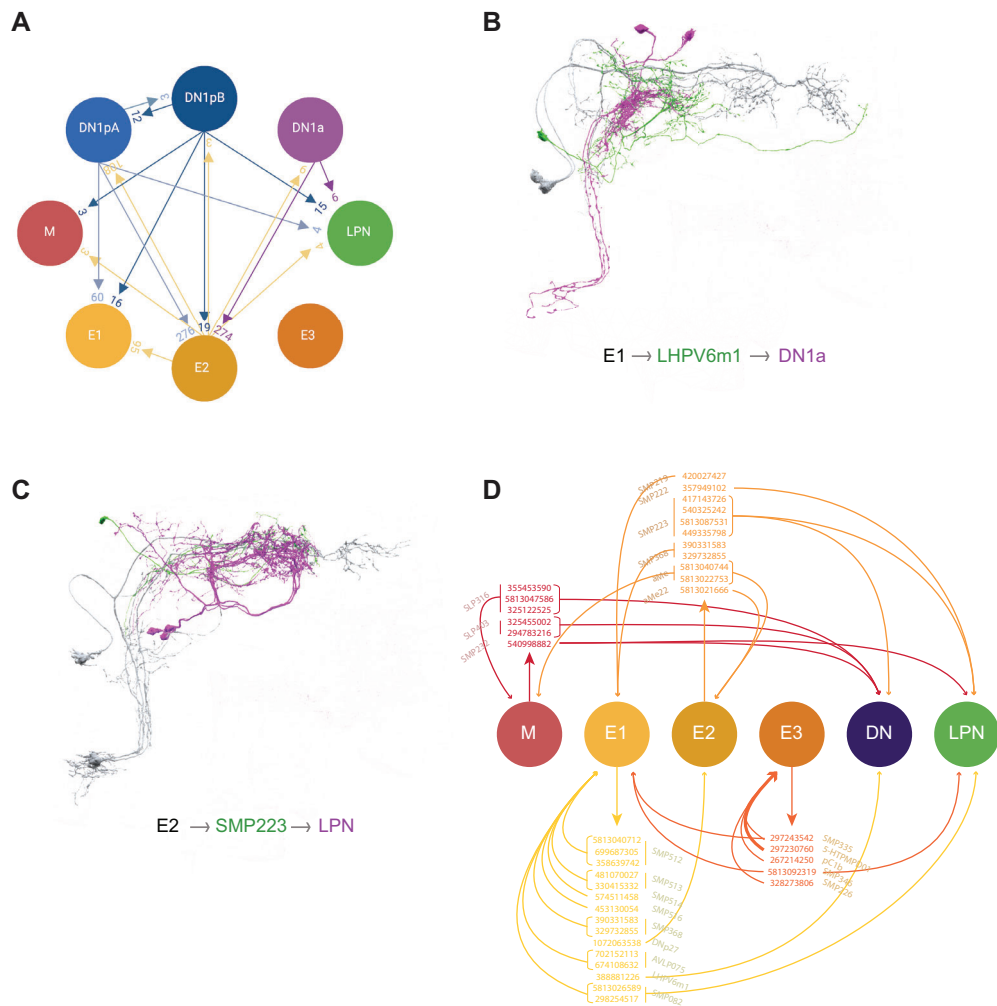

Source: https://www.biorxiv.org/content/10.1101/2022.03.02.482743v3.full.pdf
